# Supplementary material
Source: MDPI journal article supplement (https://www.mdpi.com/1424-2818/15/3/378)
Supplement: s1 [file s1]

Table S1: A list of 1208 Queensland rainforest species used to create the CSEQ and CQC phylogenies, showing the available GenBank Accession numbers for the 3 standard sequence markers *matK*, *rbcL* or *psbA-trnH*. All sequences with Accession numbers are publicly available from the open access sequence database, GenBank (<https://www.ncbi.nlm.nih.gov/genbank/>). (\*) Indicates DNA barcode sequences produced at the University of the Sunshine Coast (UniSC) that have been submitted to the BOLD database and awaiting publication. (\*\*) Indicates unpublished DNA barcode sequences produce in the laboratories of the National Museum of Natural History, Smithsonian Institution, Washington D.C., U.S.A. (#) Indicates sequences produced at the Australian Tropical Herbarium (ATH) Cairns, Queensland, Australia, available from the Public Data Portal of the BOLDSYSTEMS database (<https://www.boldsystems.org/>). (c) Indicates species that have one congener sequence included in the 3 gene DNA barcode when only one marker existed for that species.

| Order     | Family      | Taxon Name                   | <i>rbcL</i>                    | <i>matk</i>                    | <i>trnH-psbA</i>                |
|-----------|-------------|------------------------------|--------------------------------|--------------------------------|---------------------------------|
| Malvales  | Malvaceae   | <i>Abelmoschus manihot</i>   | Abelmoschus_manihot_300601385* | Abelmoschus_manihot_300601385* | Abelmoschus_manihot_300601385*  |
| Asterales | Rousseaceae | <i>Abrophyllum ornans</i>    | AF299090                       | KM894583                       | KM895126                        |
| Fabales   | Fabaceae    | <i>Abrus precatorius</i>     | Abrus_precatorius_300601386*   | Abrus_precatorius_300601386*   | Abrus_precatorius_300601386*    |
| Malvales  | Malvaceae   | <i>Abutilon auritum</i>      | Abutilon_auritum_300601387*    | KM894532                       |                                 |
| Malvales  | Malvaceae   | <i>Abutilon indicum</i>      |                                | MG742306                       | KJ637006                        |
| Malvales  | Malvaceae   | <i>Abutilon micropetalum</i> | KM895898                       | KM894746                       |                                 |
| Malvales  | Malvaceae   | <i>Abutilon oxycarpum</i>    | KM895732                       | KM894618                       |                                 |
| Malvales  | Malvaceae   | <i>Abutilon theophrasti</i>  |                                | MN553682                       | GQ435057                        |
| Fabales   | Fabaceae    | <i>Acacia bakeri</i>         | KM896024                       | KM894854                       | KM895317                        |
| Fabales   | Fabaceae    | <i>Acacia celsa</i>          | KF496481                       |                                | KC284121                        |
| Fabales   | Fabaceae    | <i>Acacia cincinnata</i>     | Acacia_cincinnata_600400424*   | Acacia_cincinnata_600400424*   | Acacia_cincinnata_600400424*    |
| Fabales   | Fabaceae    | <i>Acacia complanata</i>     | Acacia_complanata_600200004*   |                                | Acacia_complanata_600200004*    |
| Fabales   | Fabaceae    | <i>Acacia crassicarpa</i>    | KM895932                       | KJ510952                       |                                 |
| Fabales   | Fabaceae    | <i>Acacia disparrima</i>     | Acacia_disparrima_300601388*   | KM894481                       | Acacia_disparrima_300201183*    |
| Fabales   | Fabaceae    | <i>Acacia fasciculifera</i>  | AJW74906                       | AJW74212                       |                                 |
| Fabales   | Fabaceae    | <i>Acacia flavescens</i>     | Acacia_flavescens_300201160*   | Acacia_flavescens_300201160*   | Acacia_flavescens_300201160 *   |
| Fabales   | Fabaceae    | <i>Acacia harpophylla</i>    | KM895764                       | KM894642                       | Acacia_harpophylla_129308698**  |
| Fabales   | Fabaceae    | <i>Acacia longissima</i>     | Acacia_longissima_600200010*   |                                |                                 |
| Fabales   | Fabaceae    | <i>Acacia maidenii</i>       |                                | KM894773                       | KM895266                        |
| Fabales   | Fabaceae    | <i>Acacia melanoxylon</i>    | KM896131                       | KM894938                       | Acacia_melanoxylon_1076418264** |
| Fabales   | Fabaceae    | <i>Acacia oraria</i>         | Acacia_oraria_300601389*       | Acacia_oraria_300601389*       | Acacia_oraria_300601389*        |
| Fabales   | Fabaceae    | <i>Acacia oshanesii</i>      | Acacia_oshanesii_600200011 *   | KM894869                       | KM895329                        |
| Fabales   | Fabaceae    | <i>Acacia penninervis</i>    |                                | AF274159                       | KC284508                        |

|                |                |                                  |                                      |                                      |                                      |
|----------------|----------------|----------------------------------|--------------------------------------|--------------------------------------|--------------------------------------|
| Fabales        | Fabaceae       | <i>Acacia spirorbis</i>          | Acacia_spirorbis_300601390*          | Acacia_spirorbis_300601390*          | Acacia_spirorbis_300601390*          |
| Fabales        | Fabaceae       | <i>Acacia suaveolens</i>         | Acacia_suaveolens_600100004*         | Acacia_suaveolens_600200015*         | Acacia_suaveolens_600100004*         |
| Malpighiales   | Euphorbiaceae  | <i>Acalypha capillipes</i>       | AJW75016                             | AJW74296                             |                                      |
| Lamiales       | Acanthaceae    | <i>Acanthus ilicifolius</i>      | KX231351                             | KX231339                             |                                      |
| Oxalidales     | Elaeocarpaceae | <i>Aceratium concinnum</i>       | Aceratium_concinnum_300601391*       |                                      | Aceratium_concinnum_300601391*       |
| Caryophyllales | Amaranthaceae  | <i>Achyranthes aspera</i>        | KF496324                             | MH767766                             | MG947118                             |
| Oxalidales     | Cunoniaceae    | <i>Ackama australiensis</i>      | Ackama_australiensis_300601392*      |                                      | Ackama_australiensis_300601392*      |
| Myrtales       | Myrtaceae      | <i>Acmena hemilampra</i>         | Acmena_hemilampra_300401193*         | KU564534                             | KU564629                             |
| Myrtales       | Myrtaceae      | <i>Acmena ingens</i>             | AJW74454                             | AJW73850                             | KM895091                             |
| Myrtales       | Myrtaceae      | <i>Acmena resa</i>               | Acmena_resa_300701536*               | Acmena_resa_300701536*               | Acmena_resa_300701536*               |
| Myrtales       | Myrtaceae      | <i>Acmena smithii</i>            | KM896155                             |                                      | KM895396                             |
| Myrtales       | Myrtaceae      | <i>Acmenosperma claviflorum</i>  | Acmenosperma_claviflorum_300601393*  | AGT29115                             | Acmenosperma_claviflorum_300601393*  |
| Sapindales     | Rutaceae       | <i>Acradenia euodiiformis</i>    | AJW74675                             | AJW74026                             |                                      |
| Sapindales     | Rutaceae       | <i>Acronychia acidula</i>        | Acronychia_acidula_300401195*        | Acronychia_acidula_300401195*        |                                      |
| Sapindales     | Rutaceae       | <i>Acronychia acronychioides</i> | Acronychia_acronychioides_300701537* | Acronychia_acronychioides_300701537* | Acronychia_acronychioides_300601394* |
| Sapindales     | Rutaceae       | <i>Acronychia baeuerlenii</i>    |                                      | KM894963                             | Acronychia_baeuerlenii_1076420399**  |
| Sapindales     | Rutaceae       | <i>Acronychia eungellensis</i>   | KU564750                             |                                      | LN849164                             |
| Sapindales     | Rutaceae       | <i>Acronychia imperforata</i>    | KM896092                             | Acronychia_imperforata_300201158*    | Acronychia_imperforata_300201158*    |
| Sapindales     | Rutaceae       | <i>Acronychia laevis</i>         | KM895928                             | KM894770                             | KM895263                             |
| Sapindales     | Rutaceae       | <i>Acronychia oblongifolia</i>   | KM895726                             | KM894614                             | Acronychia_oblongifolia_1076419124** |
| Sapindales     | Rutaceae       | <i>Acronychia octandra</i>       |                                      | KM894968                             | LN849170                             |
| Sapindales     | Rutaceae       | <i>Acronychia pauciflora</i>     | KM896176                             | KM894972                             | Acronychia_pauciflora_1076420343**   |
| Sapindales     | Rutaceae       | <i>Acronychia pubescens</i>      | KM895991                             | KM894824                             | KM895239                             |
| Sapindales     | Rutaceae       | <i>Acronychia suberosa</i>       | KM896143                             | KM894946                             |                                      |
| Sapindales     | Rutaceae       | <i>Acronychia vestita</i>        | Acronychia_vestita_300601395*        | Acronychia_vestita_300601395*        |                                      |
| Sapindales     | Rutaceae       | <i>Acronychia wilcoxiana</i>     | KM895737                             | KM894623                             | KM895155                             |
| Ericales       | Ericaceae      | <i>Acrothamnus melaleucoides</i> | KU564751                             | KU564536                             | KU564631                             |
| Ericales       | Ericaceae      | <i>Acrotriche aggregata</i>      | Acrotriche_aggregata_600300396*      | Acrotriche_aggregata_600300396*      | Acrotriche_aggregata_600300396*      |
| Malpighiales   | Phyllanthaceae | <i>Actephila bella</i>           | KM895942                             |                                      | Actephila_bella_1076420309**         |
| Malpighiales   | Phyllanthaceae | <i>Actephila grandifolia</i>     | KM895812                             | KM894677                             | Actephila_grandifolia_129307895**    |
| Malpighiales   | Phyllanthaceae | <i>Actephila lindleyi</i>        | KM896158                             | AM745925                             |                                      |
| Malpighiales   | Phyllanthaceae | <i>Actephila sessilifolia</i>    | Actephila_sessilifolia_300701528*    | AM745932                             |                                      |

|              |               |                                                  |                                    |                                    |                                    |
|--------------|---------------|--------------------------------------------------|------------------------------------|------------------------------------|------------------------------------|
| Cupressales  | Araucariaceae | <i>Agathis robusta</i>                           | KM895812                           | EU025976                           | KM895417                           |
| Sapindales   | Meliaceae     | <i>Aglaia brownii</i>                            | KM895577                           | KM894487                           |                                    |
| Sapindales   | Meliaceae     | <i>Aglaia elaeagnoidea</i>                       | KM895610                           | KM894515                           |                                    |
| Gentianales  | Rubiaceae     | <i>Aidia racemosa</i>                            | KM896179                           | KM894976                           | KM895410                           |
| Sapindales   | Simaroubaceae | <i>Ailanthus triphysa</i>                        | KM895503                           | KM894426                           | KM895009                           |
| Brassicales  | Akaniaceae    | <i>Akania bidwillii</i>                          | KM896105                           | KM894919                           |                                    |
| Cornales     | Cornaceae     | <i>Alangium polyosmoides subsp. polyosmoides</i> | Alangium_villosum_300601396*       | KM894723                           | Alangium_villosum_1076418195**     |
| Fabales      | Fabaceae      | <i>Albizia lebbek</i>                            | MH549719                           | MH621714                           | MH621765                           |
| Fabales      | Fabaceae      | <i>Albizia procera</i>                           | Albizia_procera_300801613*         |                                    | Albizia_procera_300801613*         |
| Malpighiales | Euphorbiaceae | <i>Alchornea ilicifolia</i>                      | KM896046                           |                                    | KM895331                           |
| Malpighiales | Euphorbiaceae | <i>Alchornea thozetiana</i>                      | KM895852                           | KM894712                           |                                    |
| Sapindales   | Sapindaceae   | <i>Alectryon connatus</i>                        | KM895560                           | KM894470                           |                                    |
| Sapindales   | Sapindaceae   | <i>Alectryon coriaceus</i>                       | KM895519                           | EU20599                            |                                    |
| Sapindales   | Sapindaceae   | <i>Alectryon diversifolius</i>                   | KM895965                           | KM894801                           | KM895072                           |
| Sapindales   | Sapindaceae   | <i>Alectryon oleifolius</i>                      | KM895583                           |                                    |                                    |
| Sapindales   | Sapindaceae   | <i>Alectryon pubescens</i>                       |                                    | KM894493                           | KU564632                           |
| Sapindales   | Sapindaceae   | <i>Alectryon reticulatus</i>                     | KM896035.                          | KM894865                           |                                    |
| Sapindales   | Sapindaceae   | <i>Alectryon semicinerus</i>                     | KU564754                           | KM894679                           | KU564633                           |
| Sapindales   | Sapindaceae   | <i>Alectryon subcinereus</i>                     |                                    | KU564538                           | KU564633                           |
| Sapindales   | Sapindaceae   | <i>Alectryon subdentatus</i>                     | KM895984                           |                                    | KM895294                           |
| Sapindales   | Sapindaceae   | <i>Alectryon tomentosus</i>                      | KM895707                           | KM894598                           |                                    |
| Fagales      | Casuarinaceae | <i>Allocauarina littoralis</i>                   | Allocauarina_littoralis_300201182* | Allocauarina_littoralis_300201182* | Allocauarina_littoralis_300201182* |
| Fagales      | Casuarinaceae | <i>Allocauarina torulosa</i>                     | AY191659                           | AY033831                           |                                    |
| Poales       | Poaceae       | <i>Alloteropsis semialata</i>                    | AM849345                           | Alloteropsis_semialata             |                                    |
| Proteales    | Proteaceae    | <i>Alloxylon pinnatum</i>                        | KM895929                           | KM894771                           | KM895264                           |
| Alismatales  | Araceae       | <i>Alocasia brisbanensis</i>                     | KM896204                           | KM894991                           |                                    |
| Rosales      | Rhamnaceae    | <i>Alphitonia excelsa</i>                        | KM896142                           | Alphitonia_excelsa_300201156*      | Alphitonia_excelsa_300201156*      |
| Rosales      | Rhamnaceae    | <i>Alphitonia oblata</i>                         |                                    | KU564539                           | KU564634                           |
| Rosales      | Rhamnaceae    | <i>Alphitonia petriei</i>                        | MF787354                           | KM894554                           | KM895104                           |
| Rosales      | Rhamnaceae    | <i>Alphitonia whitei</i>                         | Alphitonia_whitei_300601397*       | Alphitonia_whitei_300601397*       | Alphitonia_whitei_300601397*       |
| Zingiberales | Zingiberaceae | <i>Alpinia arundelliana</i> <sup>c</sup>         | KM895999                           | KJ872322                           |                                    |
| Zingiberales | Zingiberaceae | <i>Alpinia caerulea</i> <sup>c</sup>             | KM896031                           | KJ872322                           | HG963633                           |
| Gentianales  | Apocynaceae   | <i>Alstonia constricta</i>                       |                                    | KM894783                           | KM895270                           |

|                |                  |                                   |                                      |                                 |                                      |
|----------------|------------------|-----------------------------------|--------------------------------------|---------------------------------|--------------------------------------|
| Gentianales    | Apocynaceae      | <i>Alstonia muelleriana</i>       | Alstonia_muelleriana_300601398*      | Alstonia_muelleriana_300601398* | Alstonia_muelleriana_300601398*      |
| Gentianales    | Apocynaceae      | <i>Alstonia scholaris</i>         | Alstonia_scholaris_300601399*        | JM228931                        | Alstonia_scholaris_300601399*        |
| Caryophyllales | Amaranthaceae    | <i>Alternanthera ficoidea</i>     | MK757193                             | GQ429069                        |                                      |
| Gentianales    | Apocynaceae      | <i>Alyxia magnifolia</i>          | KM896209                             | KM894996                        |                                      |
| Gentianales    | Apocynaceae      | <i>Alyxia ruscifolia</i>          | KM896137                             | KM894942                        | Alyxia_ruscifolia_129307922**        |
| Gentianales    | Apocynaceae      | <i>Alyxia spicata</i>             | Alyxia_spicata_300801591*            | Alyxia_spicata_300701529*       |                                      |
| Ericales       | Sapotaceae       | <i>Amorphospermum antilogum</i>   | Amorphospermum_antilogum_300601400*  | KM894918                        | DQ344119                             |
| Santalales     | Loranthaceae     | <i>Amyema congener</i>            | Amyema_congener_600300326*           |                                 | Amyema_congener_600300326*           |
| Santalales     | Loranthaceae     | <i>Amylothea dictyophleba</i>     | KM895635                             |                                 | KM895092                             |
| Poales         | Poaceae          | <i>Ancistrachne uncinulata</i>    | KU564756                             |                                 | KU564635                             |
| Commelinales   | Commelinaceae    | <i>Aneilema acuminatum</i>        | KU564757                             | LC323131                        |                                      |
| Myrtales       | Myrtaceae        | <i>Angophora woodsiana</i>        | Angophora_woodsiana_600300517*       | Angophora_woodsiana_600300517*  | Angophora_woodsiana_600300517*       |
| Escalloniales  | Escalloniaceae   | <i>Anopterus macleayanus</i>      |                                      | KM894751                        | Anopterus_macleayanus_1076418247**   |
| Sapindales     | Meliaceae        | <i>Anthocarapa nitidula</i>       | KM895768                             | KM894644                        | Anthocarapa_nitidula_129308643**     |
| Malpighiales   | Phyllanthaceae   | <i>Antidesma parvifolium</i>      | Antidesma_parvifolium_300601401*     |                                 |                                      |
| Gentianales    | Rubiaceae        | <i>Antirhea putaminosa</i>        |                                      | KU564540                        | KU564636                             |
| Gentianales    | Rubiaceae        | <i>Antirhea tenuiflora</i>        | Antirhea_tenuiflora_300701539*       | Antirhea_tenuiflora_300701539*  | Antirhea_tenuiflora_300701539*       |
| Rosales        | Cannabaceae      | <i>Aphananthe philippinensis</i>  | KM896058                             | KM894881                        |                                      |
| Saxifragales   | Aphanopetalaceae | <i>Aphanopetalum resinosum</i>    | KM895541                             |                                 | Aphanopetalum_resinosum_1076420508** |
| Fabales        | Fabaceae         | <i>Aphyllodium biarticulatum</i>  | Aphyllodium_biarticulatum_300801622* |                                 | Aphyllodium_biarticulatum_300801622* |
| Icacinales     | Icacinaceae      | <i>Apodytes brachystylis</i>      | Apodytes_brachystylis_300601402*     |                                 | Apodytes_brachystylis_300601402*     |
| Brassicales    | Capparaceae      | <i>Apophyllum anomalum</i>        | KM895931                             | KM894772                        | KM895265                             |
| Cupressales    | Araucariaceae    | <i>Araucaria bidwillii</i>        | KM895985                             |                                 | Araucaria_bidwillii_1076418245**     |
| Cupressales    | Araucariaceae    | <i>Araucaria cunninghamii</i>     | AM920233                             | AM920147                        |                                      |
| Fabales        | Fabaceae         | <i>Archidendron grandiflorum</i>  | KM895934                             | KM894775.                       |                                      |
| Fabales        | Fabaceae         | <i>Archidendron hendersonii</i>   | KU564759                             |                                 | KU564637                             |
| Fabales        | Fabaceae         | <i>Archidendron lovelliae</i>     | KU564760                             | KU564541                        | KU564638                             |
| Fabales        | Fabaceae         | <i>Archidendron muellerianum</i>  | KM895710                             | KM894601                        |                                      |
| Fabales        | Fabaceae         | <i>Archidendron vaillantii</i>    | *                                    |                                 | Archidendron_vaillantii_300601403*   |
| Fabales        | Fabaceae         | <i>Archidendropsis thozetiana</i> | KM895558                             | KM894536                        |                                      |
| Myrtales       | Myrtaceae        | <i>Archirhodomyrtus beckleri</i>  | KM895772                             | KM894647                        | KM895175                             |

|              |                  |                                                           |                                      |                                      |                                       |
|--------------|------------------|-----------------------------------------------------------|--------------------------------------|--------------------------------------|---------------------------------------|
| Arecales     | Arecaceae        | <i>Archontophoenix alexandrae</i>                         | KM895600                             |                                      | Archontophoenix_alexandrae_129308679* |
| Arecales     | Arecaceae        | <i>Archontophoenix cunninghamiana</i>                     | KM895593                             | KM894505                             |                                       |
| Ericales     | Primulaceae      | <i>Ardisia bakeri</i> <sup>c</sup>                        | KM896048                             |                                      | Ardisia_sp_300901650*                 |
| Asterales    | Argophyllaceae   | <i>Argophyllum nullumense</i>                             |                                      | KM894822                             | KM895298                              |
| Malvales     | Malvaceae        | <i>Argyrodendron actinophyllum</i>                        | KM895552                             |                                      | KM895045                              |
| Malvales     | Malvaceae        | <i>Argyrodendron polyandrum</i>                           | Argyrodendron_polyandrum_300701540*  |                                      | Argyrodendron_polyandrum_300701540*   |
| Malvales     | Malvaceae        | <i>Argyrodendron</i> sp. (Kin Kin W.D.Francis AQ81198)    | KM895859                             | KM894719                             |                                       |
| Malvales     | Malvaceae        | <i>Argyrodendron</i> sp. (Whitsundays W.J.McDonald+ 5831) | Argyrodendron_Whitsundays_300801624* | Argyrodendron_Whitsundays_300801624* | Argyrodendron_Whitsundays_300801624*  |
| Malvales     | Malvaceae        | <i>Argyrodendron trifoliolatum</i>                        | KM896019                             |                                      | KM895315                              |
| Poales       | Poaceae          | <i>Aristida queenslandica</i>                             | Aristida_queenslandica_600300411*    | Aristida_queenslandica_600300411*    | Aristida_queenslandica_600300411*     |
| Poales       | Poaceae          | <i>Aristida vagans</i>                                    | HE573355                             | HE573952                             |                                       |
| Poales       | Poaceae          | <i>Aristida warburgii</i>                                 | Aristida_warburgii_600400532*        | Aristida_warburgii_600400532*        | Aristida_warburgii_600400532*         |
| Piperales    | Aristolochiaceae | <i>Aristolochia acuminata</i>                             | Aristolochia_acuminata_300801585*    | Aristolochia_acuminata_300801585*    |                                       |
| Poales       | Poaceae          | <i>Arundinella nepalensis</i>                             | LN907890                             | LN906655                             |                                       |
| Sapindales   | Sapindaceae      | <i>Arytera dictyoneura</i>                                | KM895551                             | KM894466                             | KM895044                              |
| Sapindales   | Sapindaceae      | <i>Arytera distylis</i>                                   | KM895521                             | KM894441                             | KM895022                              |
| Sapindales   | Sapindaceae      | <i>Arytera divaricata</i>                                 | KM896095                             | KM894909                             |                                       |
| Sapindales   | Sapindaceae      | <i>Arytera foveolata</i>                                  | KM895631                             | KM894533                             |                                       |
| Sapindales   | Sapindaceae      | <i>Arytera microphylla</i>                                | KM895808                             |                                      | Arytera_microphylla_1076419103**      |
| Sapindales   | Sapindaceae      | <i>Atalaya calcicola</i>                                  |                                      | KU564542                             | KU564639                              |
| Sapindales   | Sapindaceae      | <i>Atalaya hemiglauca</i>                                 | KM895582                             | KM894492                             |                                       |
| Sapindales   | Sapindaceae      | <i>Atalaya multiflora</i>                                 | KM896164                             |                                      | Atalaya_multiflora_1076420315**       |
| Sapindales   | Sapindaceae      | <i>Atalaya salicifolia</i>                                | KM895746                             |                                      | Atalaya_salicifolia_1076419078**      |
| Gentianales  | Rubiaceae        | <i>Atractocarpus benthamianus</i>                         | KM895691                             | KM894580                             |                                       |
| Gentianales  | Rubiaceae        | <i>Atractocarpus chartaceus</i>                           | KM895892                             | KM894440                             | Atractocarpus_chartaceus_129308476**  |
| Gentianales  | Rubiaceae        | <i>Atractocarpus fitzalanii</i> subsp. <i>fitzalanii</i>  | Atractocarpus_fitzalanii_300701541*  | Atractocarpus_fitzalanii_300701541*  | Atractocarpus_fitzalanii_300701541*   |
| Apiales      | Pittosporaceae   | <i>Auranticarpa rhombifolia</i>                           | KM896062                             | KM894886                             | KM895344                              |
| Malpighiales | Picrodendraceae  | <i>Austrobuxus swainii</i>                                | KM896126                             |                                      | Austrobuxus_swainii_1076420565**      |
| Fabales      | Fabaceae         | <i>Austrocallerya australis</i>                           | KM895586                             | KM894496                             |                                       |
| Fabales      | Fabaceae         | <i>Austrocallerya megasperma</i>                          | KM895548                             | EU424077                             | EU424092                              |
| Myrtales     | Myrtaceae        | <i>Austromyrtus dulcis</i>                                | Austromyrtus_dulcis_300201162*       | Austromyrtus_dulcis_300201162*       | Austromyrtus_dulcis_300201162*        |

|              |                |                                                          |                                  |                                  |                                         |
|--------------|----------------|----------------------------------------------------------|----------------------------------|----------------------------------|-----------------------------------------|
| Fabales      | Fabaceae       | <i>Austroteenisia blackii</i>                            | KM895762                         | KM894641                         |                                         |
| Fabales      | Fabaceae       | <i>Austroteenisia glabristyla</i>                        | KM895740                         | KM894625                         | Austroteenisia_glabristyla_1076418244** |
| Poales       | Poaceae        | <i>Austrostipa ramosissima</i>                           | KU564764                         | KU564545                         | KU564642                                |
| Myrtales     | Myrtaceae      | <i>Backhousia angustifolia</i>                           | KM895815                         | KM894680                         | KM895200                                |
| Myrtales     | Myrtaceae      | <i>Backhousia citriodora</i>                             | KM895518                         | KM894439                         | KM895020                                |
| Myrtales     | Myrtaceae      | <i>Backhousia kingii</i>                                 | KM896076                         |                                  | KM895350                                |
| Myrtales     | Myrtaceae      | <i>Backhousia leptopetala</i>                            | KM896000                         | KM894830                         |                                         |
| Myrtales     | Myrtaceae      | <i>Backhousia myrtifolia</i>                             | KM895944                         | KM894781                         |                                         |
| Myrtales     | Myrtaceae      | <i>Backhousia oligantha</i>                              | KM895863                         | KM894720                         |                                         |
| Myrtales     | Myrtaceae      | <i>Backhousia sciadophora</i>                            | KM895513                         | KM894434                         | KM895015                                |
| Myrtales     | Myrtaceae      | <i>Backhousia sp. Belgama</i>                            | KU564767                         | KU564548                         | KU564645                                |
| Myrtales     | Myrtaceae      | <i>Backhousia subargentea</i>                            | KM895603                         | KM894511                         |                                         |
| Malpighiales | Balanopaceae   | <i>Balanops australiana</i>                              | Balanops_australiana_300701481*  | Balanops_australiana_300701481*  |                                         |
| Malpighiales | Euphorbiaceae  | <i>Baloghia inophylla</i>                                | KM895954                         | AB233771                         |                                         |
| Malpighiales | Euphorbiaceae  | <i>Baloghia marmorata</i>                                | KM895795                         | KM894665                         | Baloghia_marmorata_1076420294**         |
| Proteales    | Proteaceae     | <i>Banksia integrifolia</i>                              | Banksia_integrifolia_300201177*  | Banksia_integrifolia_300201177*  | Banksia_integrifolia_300201177*         |
| Fabales      | Fabaceae       | <i>Barklya syringifolia</i>                              | KM896091                         |                                  | KM895357                                |
| Laurales     | Lauraceae      | <i>Beilschmiedia collina</i>                             | Beilschmiedia_collina_300701542* | Beilschmiedia_collina_300701542* | Beilschmiedia_collina_300701542*        |
| Laurales     | Lauraceae      | <i>Beilschmiedia elliptica</i>                           | KM896207                         | KM894995                         | KM895424                                |
| Laurales     | Lauraceae      | <i>Beilschmiedia obtusifolia</i>                         | KM895545                         | KM894462                         | KM895040                                |
| Malvales     | Malvaceae      | <i>Berrya rotundifolia</i>                               | Berrya_rotundifolia_300801617*   | Berrya_rotundifolia_300801617*   | Berrya_rotundifolia_300801617*          |
| Apiales      | Pittosporaceae | <i>Billardiera scandens</i> <sup>C</sup>                 | Billardiera_scandens_600100009*  |                                  |                                         |
| Proteales    | Proteaceae     | <i>Bleasdalea bleasdalei</i>                             | Bleasdalea_bleasdalei_300701543* | Bleasdalea_bleasdalei_300701543* | Bleasdalea_bleasdalei_300701543*        |
| Gentianales  | Rubiaceae      | <i>Bobea myrtoides</i>                                   | KF496863                         | JN564046                         | KF731852                                |
| Lamiales     | Gesneriaceae   | <i>Boea hygroskopica</i>                                 | Boea_hygroskopica_300401206*     | Boea_hygroskopica_300401206*     | Boea_hygroskopica_300401206*            |
| Rosales      | Urticaceae     | <i>Boehmeria virgata</i> var. <i>austroqueenslandica</i> | KM896014                         | KM894844                         | KM895312                                |
| Sapindales   | Rutaceae       | <i>Bosistoa medicinalis</i>                              | KM895745                         | KM894628                         |                                         |
| Sapindales   | Rutaceae       | <i>Bosistoa pentacocca</i>                               | KM895741                         | KM894626                         |                                         |
| Sapindales   | Rutaceae       | <i>Bosistoa transversa</i>                               | KM895993                         | KM894827                         |                                         |
| Poales       | Poaceae        | <i>Bothriochloa pertusa</i>                              | MH549750                         | MH621735                         | MH621804                                |
| Sapindales   | Rutaceae       | <i>Bouchardatia neurococca</i>                           | KM896173                         | KM894969                         |                                         |
| Cycadales    | Zamiaceae      | <i>Bowenia serrulata</i>                                 | AB645707                         | AF410173                         |                                         |
| Malvales     | Malvaceae      | <i>Brachychiton acerifolius</i>                          | KM896190                         | KM894984                         | KM895418                                |

|              |                |                                               |                                   |                                   |                                   |
|--------------|----------------|-----------------------------------------------|-----------------------------------|-----------------------------------|-----------------------------------|
| Malvales     | Malvaceae      | <i>Brachychiton australis</i>                 | KM895925                          | Brachychiton_australis_300601406* | Brachychiton_australis_300601406* |
| Malvales     | Malvaceae      | <i>Brachychiton bidwillii</i>                 | KM895818                          | KM894683                          | KM895201                          |
| Malvales     | Malvaceae      | <i>Brachychiton compactus</i>                 | Brachychiton_compactus_300401207* |                                   | Brachychiton_compactus_300401207* |
| Malvales     | Malvaceae      | <i>Brachychiton discolor</i>                  |                                   | KM894970                          | KM895402                          |
| Malvales     | Malvaceae      | <i>Brachychiton populneus</i>                 |                                   | KM894664                          | KM895189                          |
| Malvales     | Malvaceae      | <i>Brachychiton rupestris</i>                 | KM895749                          | KM894632                          | KM895162                          |
| Malpighiales | Ochnaceae      | <i>Brackenridgea australiana</i> <sup>C</sup> | KF496371                          |                                   | Brackenridgea_nitida_300601407*   |
| Malpighiales | Ochnaceae      | <i>Brackenridgea nitida</i>                   | Brackenridgea_nitida_300601407*   |                                   | Brackenridgea_nitida_300601407*   |
| Malpighiales | Phyllanthaceae | <i>Breynia cernua</i>                         | Breynia_cernua_300601408*         | Breynia_cernua_300601408*         | Breynia_cernua_300601408*         |
| Malpighiales | Phyllanthaceae | <i>Breynia oblongifolia</i>                   | KM896027                          | KM894857                          |                                   |
| Malpighiales | Phyllanthaceae | <i>Bridelia exaltata</i>                      | KM896147                          |                                   | KM895390                          |
| Malpighiales | Phyllanthaceae | <i>Bridelia leichhardtii</i>                  | KM895660                          |                                   | KM895102                          |
| Malpighiales | Phyllanthaceae | <i>Bridelia tomentosa</i>                     | Bridelia_tomentosa_300401208*     |                                   | Bridelia_tomentosa_300401208*     |
| Sapindales   | Simaroubaceae  | <i>Brucea javanica</i>                        | Brucea_javanica_300401209*        | Brucea_javanica_300401209*        |                                   |
| Lamiales     | Acanthaceae    | <i>Brunoniella australis</i>                  | Brunoniella_australis_600300405*  | Brunoniella_australis_600300405*  | Brunoniella_australis_600300405*  |
| Lamiales     | Acanthaceae    | <i>Brunoniella spiciflora</i>                 | Brunoniella_spiciflora_300402210* |                                   | Brunoniella_spiciflora_300402210* |
| Canellales   | Winteraceae    | <i>Bubbia semecarpoides</i>                   | Bubbia_semecarpoides_300601409*   | Bubbia_semecarpoides_300601409*   | Bubbia_semecarpoides_300601409*   |
| Sapindales   | Anacardiaceae  | <i>Buchanania arborescens</i>                 | MH332414                          | MH332536                          |                                   |
| Proteales    | Proteaceae     | <i>Buckinghamia celsissima</i>                | JN564178                          | JN564059                          |                                   |
| Poales       | Cyperaceae     | <i>Bulbostylis barbata</i>                    | KY627307                          | KJ772592                          |                                   |
| Apiales      | Pittosporaceae | <i>Bursaria incana</i>                        | KM896208                          |                                   | KM895425                          |
| Apiales      | Pittosporaceae | <i>Bursaria tenuifolia</i>                    | Bursaria_tenuifolia_300601411*    | Bursaria_tenuifolia_300601411*    | Bursaria_tenuifolia_300601411*    |
| Fabales      | Fabaceae       | <i>Caesalpinia bonduc</i>                     | KM895844                          | KM894702                          | Caesalpinia_bonduc_1076420521**   |
| Fabales      | Fabaceae       | <i>Caesalpinia crista</i>                     |                                   | HM049549                          | MH826453                          |
| Fabales      | Fabaceae       | <i>Caesalpinia nitens</i>                     | KM895525                          |                                   | KM895025                          |
| Arecales     | Arecaceae      | <i>Calamus aruensis</i>                       | MH826767                          |                                   | KJ500037                          |
| Arecales     | Arecaceae      | <i>Calamus moti</i>                           | Calamus_moti_300401211*           | Calamus_moti_300401211*           |                                   |
| Arecales     | Arecaceae      | <i>Calamus muelleri</i>                       | KM896129                          | KM894935                          |                                   |
| Asparagales  | Orchidaceae    | <i>Calanthe triplicata</i>                    | KM896061                          | KM894885                          |                                   |
| Lamiales     | Lamiaceae      | <i>Callicarpa longifolia</i>                  | Callicarpa_longifolia_300401212*  | Callicarpa_longifolia_300401212*  |                                   |
| Lamiales     | Lamiaceae      | <i>Callicarpa pedunculata</i>                 | KM895685                          | KM894575                          |                                   |
| Oxalidales   | Cunoniaceae    | <i>Callicoma serratifolia</i>                 | Callicoma_serratifolia_600200029* | KM894952                          | Callicoma_serratifolia_600200029* |
| Cupressales  | Cupressaceae   | <i>Callitris columellaris</i>                 | Callitris_columellaris_600200265* | LC404700                          | KU564646                          |

|                |                |                                                              |                                  |                                  |                                      |
|----------------|----------------|--------------------------------------------------------------|----------------------------------|----------------------------------|--------------------------------------|
| Malpighiales   | Clusiaceae     | <i>Calophyllum inophyllum</i>                                | AY625020                         | HQ331553                         |                                      |
| Sapindales     | Burseraceae    | <i>Canarium australasicum</i>                                | KM895524                         |                                  | Canarium_australasicum_1076420381**  |
| Sapindales     | Burseraceae    | <i>Canarium australianum</i> var. <i>australianum</i>        | Canarium_australianum_300801621* | Canarium_australianum_300801621* |                                      |
| Sapindales     | Burseraceae    | <i>Canarium muelleri</i>                                     | Canarium_muelleri_300601412*     |                                  | Canarium_muelleri_300601412*         |
| Fabales        | Fabaceae       | <i>Canavalia papuana</i>                                     | KU564770                         | KU564549                         | KU564648                             |
| Fabales        | Fabaceae       | <i>Canavalia rosea</i>                                       | MH767682                         | MH767984                         |                                      |
| Brassicales    | Capparaceae    | <i>Capparis arborea</i>                                      | KM896139                         | KM894943                         |                                      |
| Brassicales    | Capparaceae    | <i>Capparis lasiantha</i>                                    | KM895658                         | KM894551                         |                                      |
| Brassicales    | Capparaceae    | <i>Capparis loranthifolia</i> var. <i>bancroftii</i>         |                                  | KU564550                         | Capparis_loranthifolia_1076420519**  |
| Brassicales    | Capparaceae    | <i>Capparis lucida</i>                                       | Capparis_lucida_300401216*       | Capparis_lucida_300401216*       |                                      |
| Brassicales    | Capparaceae    | <i>Capparis mitchellii</i>                                   | KM895827                         | KM894690                         | KU564649                             |
| Brassicales    | Capparaceae    | <i>Capparis ornans</i>                                       | Capparis_ornans_300601413*       | KM894945                         |                                      |
| Brassicales    | Capparaceae    | <i>Capparis sarmentosa</i>                                   | KM896107                         | KM894921                         |                                      |
| Brassicales    | Capparaceae    | <i>Capparis sepiaria</i>                                     | Capparis_sepiaria_300601414*     | Capparis_sepiaria_300601414*     |                                      |
| Malpighiales   | Rhizophoraceae | <i>Carallia brachiata</i>                                    | KM895564                         |                                  | Carallia_brachiata_1076419047**      |
| Proteales      | Proteaceae     | <i>Cardwellia sublimis</i>                                   | Cardwellia_sublimis_300601415*   | JN564074                         | Cardwellia_sublimis_300601415*       |
| Poales         | Cyperaceae     | <i>Carex pumila</i>                                          | JX644641                         | HG915872                         |                                      |
| Poales         | Cyperaceae     | <i>Carex</i> sp.                                             | KP402681                         | KP402326                         |                                      |
| Gentianales    | Apocynaceae    | <i>Carissa ovata</i>                                         | KM895648                         | KM894543                         |                                      |
| Caryophyllales | Aizoaceae      | <i>Carpobrotus edulis</i>                                    | HM849868                         | JQ024942                         |                                      |
| Ranunculales   | Menispermaceae | <i>Carronia multisepealea</i>                                | KM895627                         | KM894529                         | KM895086                             |
| Malpighiales   | Salicaceae     | <i>Casearia multinervosa</i>                                 | KM895512                         | KM894433                         | Casearia_multinervosa_129307924**    |
| Fabales        | Fabaceae       | <i>Cassia brewsteri</i>                                      | KM895987                         |                                  | KM895296                             |
| Fabales        | Fabaceae       | <i>Cassia marksiana</i>                                      | KM895872                         | KM894728                         |                                      |
| Fabales        | Fabaceae       | <i>Cassia</i> sp. (Paluma Range G.Sankowsky+ 450)            | Cassia_PalumaRange_300401218*    |                                  | Cassia_PalumaRange_300401218*        |
| Fabales        | Fabaceae       | <i>Cassia tomentella</i>                                     | KM895538                         | KM894456                         |                                      |
| Asterales      | Asteraceae     | <i>Cassinia compacta</i>                                     | KU564772                         | KU564552                         | KU564650                             |
| Laurales       | Lauraceae      | <i>Cassytha filiformis</i>                                   | Cassytha_filiformis_600400437*   | Cassytha_filiformis_600400437*   | AF261996                             |
| Laurales       | Lauraceae      | <i>Cassytha pubescens</i>                                    | Cassytha_pubescens_600400463*    | AJ627921                         | Cassytha_pubescens_600400463*        |
| Fabales        | Fabaceae       | <i>Castanospermum australe</i>                               | KM895528                         | KM894449                         | Castanospermum_australe_1076420498** |
| Sapindales     | Sapindaceae    | <i>Castanospora alphandii</i>                                | KM895499                         | KM894422                         | Castanospora_alphandii_1076419091**  |
| Fagales        | Casuarinaceae  | <i>Casuarina cunninghamiana</i> subsp. <i>cunninghamiana</i> | GU135202                         | GU135040                         | GU135369                             |



|              |                   |                                   |                                    |                                |                                    |
|--------------|-------------------|-----------------------------------|------------------------------------|--------------------------------|------------------------------------|
| Fagales      | Casuarinaceae     | <i>Casuarina equisetifolia</i>    | GU135200                           | GU135038                       | GU135367                           |
| Vitales      | Vitaceae          | <i>Causonis clematidea</i>        | KM896184                           | KM894979                       |                                    |
| Vitales      | Vitaceae          | <i>Causonis eurytnema</i>         | KM895734                           | KM894620                       | KM895154                           |
| Vitales      | Vitaceae          | <i>Causonis trifolia</i>          | KY766535                           | KY766440                       | HM58566                            |
| Vitales      | Vitaceae          | <i>Cayratia acris</i>             | KM895507                           | KM894429                       | KM895011                           |
| Vitales      | Vitaceae          | <i>Cayratia japonica</i>          | KU564773                           | HG004950                       | KC16656                            |
| Vitales      | Vitaceae          | <i>Cayratia saponaria</i>         | KU564774                           | KU564553                       | KU564652                           |
| Celastrales  | Celastraceae      | <i>Celastrus australis</i>        | KM895571                           | KM894480                       |                                    |
| Celastrales  | Celastraceae      | <i>Celastrus subspicata</i>       | KM896110                           | KM894924                       |                                    |
| Rosales      | Cannabaceae       | <i>Celtis paniculata</i>          | KM895798                           | KM894667                       | KM895191                           |
| Rosales      | Cannabaceae       | <i>Celtis philippensis</i>        | Celtis_philippensis_300401220*     | AY263925                       | Celtis_philippensis_300401220*     |
| Rosales      | Cannabaceae       | <i>Celtis timorensis</i>          | KR528957                           | KR530558                       | KR532814                           |
| Poales       | Poaceae           | <i>Cenchrus echinatus</i>         | MH549766                           | MH621682                       | MH621820                           |
| Apiales      | Apiaceae          | <i>Centella asiatica</i>          | D44559                             | KJ772644                       |                                    |
| Apiales      | Araliaceae        | <i>Cephalalaria cephalobotrys</i> | KM895704                           | KM894732                       |                                    |
| Oxalidales   | Cunoniaceae       | <i>Ceratopetalum apetalum</i>     | KM895900                           |                                | KM895248                           |
| Gentianales  | Apocynaceae       | <i>Cerbera dumicola</i>           | Cerbera_dumicola_300401221*        |                                | Cerbera_dumicola_300401221*        |
| Gentianales  | Apocynaceae       | <i>Cerbera manghas</i>            | Cerbera_manghas_300801607*         | Cerbera_manghas_300801607*     |                                    |
| Lamiales     | Oleaceae          | <i>Chionanthus acuminiger</i>     | Chionanthus_acuminigera_300601417* |                                | Chionanthus_acuminigera_300601417* |
| Lamiales     | Oleaceae          | <i>Chionanthus ramiflorus</i>     | KM895589                           |                                | HM999670                           |
| Poales       | Poaceae           | <i>Chloris virgata</i>            | MF065175                           | MF064069                       | KP711188                           |
| Laurales     | Lauraceae         | <i>Cinnamomum baileyianum</i>     | KU564775                           | KU564554                       | KU564653                           |
| Laurales     | Lauraceae         | <i>Cinnamomum laubatii</i>        | Cinnamomum_laubatii_300701544*     | Cinnamomum_laubatii_300701544* | Cinnamomum_laubatii_300701544*     |
| Laurales     | Lauraceae         | <i>Cinnamomum oliveri</i>         | KM895915                           | KM894760                       |                                    |
| Laurales     | Lauraceae         | <i>Cinnamomum virens</i>          | KM895697                           | KM894586                       |                                    |
| Vitales      | Vitaceae          | <i>Cissus antarctica</i>          | KM895883                           | KM894737                       |                                    |
| Vitales      | Vitaceae          | <i>Cissus hastata</i>             | Cissus_hastata_300401224*          | Cissus_hastata_300401224*      | Cissus_hastata_300401224*          |
| Vitales      | Vitaceae          | <i>Cissus hypoglauca</i>          | KM895959                           |                                | KM895277                           |
| Vitales      | Vitaceae          | <i>Cissus penninervis</i>         | Cissus_penninervis_300601418*      |                                | Cissus_penninervis_300601418*      |
| Vitales      | Vitaceae          | <i>Cissus reniformis</i>          | Cissus_reniformis_300601419*       | Cissus_reniformis_300601419*   | Cissus_reniformis_300601419*       |
| Vitales      | Vitaceae          | <i>Cissus sterculiifolia</i>      | KM895832                           | KM894694                       |                                    |
| Aquifoliales | Cardiopteridaceae | <i>Citronella moorei</i>          | KM896008                           |                                | Citronella_moorei_1076418255**     |

|              |                   |                                                   |                                     |                                     |                                      |
|--------------|-------------------|---------------------------------------------------|-------------------------------------|-------------------------------------|--------------------------------------|
| Aquifoliales | Cardiopteridaceae | <i>Citronella smythii</i>                         | Citronella_smythii_300601420*       | Citronella_smythii_300601420*       |                                      |
| Sapindales   | Rutaceae          | <i>Citrus australasica</i>                        |                                     | KU564555                            | Citrus_australasica_1076420476**     |
| Sapindales   | Rutaceae          | <i>Citrus australis</i>                           | KM895750                            |                                     | KM895163                             |
| Malpighiales | Euphorbiaceae     | <i>Claoxylon angustifolium</i> <sup>c</sup>       | Claoxylon_angustifolium_300401226*  |                                     | KM895198                             |
| Malpighiales | Euphorbiaceae     | <i>Claoxylon australe</i>                         | KM895811                            |                                     | KM895198                             |
| Malpighiales | Euphorbiaceae     | <i>Claoxylon tenerifolium subsp. tenerifolium</i> | KM896193                            |                                     | Claoxylon_tenerifolium_1076419048**  |
| Sapindales   | Rutaceae          | <i>Clausena smyrelliana</i>                       | KM895207                            |                                     | KM895831                             |
| Malpighiales | Euphorbiaceae     | <i>Cleidion javanicum</i>                         | Cleidion_javanicum_300401227*       | Cleidion_javanicum_300401227*       |                                      |
| Malpighiales | Phyllanthaceae    | <i>Cleistanthus cunninghamii</i>                  | KM895814                            |                                     |                                      |
| Malpighiales | Phyllanthaceae    | <i>Cleistanthus dallachyanus</i>                  | KU564777                            |                                     | KU564654                             |
| Malpighiales | Phyllanthaceae    | <i>Cleistanthus xerophilus</i>                    | Cleistanthus_xerophilus_300701534*  |                                     | Cleistanthus_xerophilus_300701534*   |
| Vitales      | Vitaceae          | <i>Clematicissus opaca</i>                        | KM895632                            | KX951009                            | JQ182501                             |
| Ranunculales | Ranunculaceae     | <i>Clematis faucettii</i>                         | KU564779                            | KU564557                            |                                      |
| Ranunculales | Ranunculaceae     | <i>Clematis glycinoides</i>                       | Clematis_glycinoides_300601421*     | Clematis_glycinoides_300601421*     | Clematis_glycinoides_300601421*      |
| Ranunculales | Ranunculaceae     | <i>Clematis pickeringii</i>                       |                                     | KM894949                            | KM895393                             |
| Brassicales  | Capparaceae       | <i>Cleome viscosa</i>                             |                                     | EU371806                            | AJ876592                             |
| Lamiales     | Lamiaceae         | <i>Clerodendrum floribundum</i>                   | Clerodendrum_floribundum_600400488* | Clerodendrum_floribundum_600400488* | Clerodendrum_floribundum_600400488*  |
| Lamiales     | Lamiaceae         | <i>Clerodendrum inerme</i>                        | Clerodendrum_inerme_300701545*      | Clerodendrum_inerme_300701545*      | Clerodendrum_inerme_300701545*       |
| Lamiales     | Lamiaceae         | <i>Clerodendrum longiflorum var. glabrum</i>      | KU564780                            | KU564558                            | KU564656                             |
| Lamiales     | Lamiaceae         | <i>Clerodendrum tomentosum</i>                    | KM89563                             | KM894535                            |                                      |
| Sapindales   | Rutaceae          | <i>Coatesia paniculata</i>                        | KM895807                            | KM894516                            |                                      |
| Malvales     | Bixaceae          | <i>Cochlospermum gillivraei</i>                   | Cochlospermum_gillivraei_300601422* | Cochlospermum_gillivraei_300601422* |                                      |
| Brassicales  | Gyrostemonaceae   | <i>Codonocarpus attenuatus</i>                    | KU564781                            | Codonocarpus_attenuatus_300101038*  | KU564657                             |
| Gentianales  | Rubiaceae         | <i>Coelospermum decipiens</i>                     | KF496337                            | JN180303                            |                                      |
| Gentianales  | Rubiaceae         | <i>Coelospermum paniculatum</i>                   | KM895568                            | KM894848                            | Coelospermum_paniculatum_129308477** |
| Gentianales  | Rubiaceae         | <i>Coelospermum reticulatum</i>                   | KM895645                            |                                     | KM895095                             |
| Rosales      | Rhamnaceae        | <i>Colubrina asiatica</i>                         | Colubrina_asiatica_300601423*       | Colubrina_asiatica_300601423*       | Colubrina_asiatica_300601423*        |
| Fabales      | Polygalaceae      | <i>Comesperma esulifolium</i>                     | Comesperma_esulifolium_300801615*   | EU596516                            |                                      |
| Commelinales | Commelinaceae     | <i>Commelina benghalensis</i>                     | MH767487                            | KJ772669                            | JN044310                             |
| Commelinales | Commelinaceae     | <i>Commelina diffusa</i>                          | MH549792                            | MH552284                            | MH621845                             |
| Commelinales | Commelinaceae     | <i>Commelina ensifolia</i>                        | Commelina_ensifolia_300801615*      |                                     | Commelina_ensifolia_300801615*       |
| Malvales     | Malvaceae         | <i>Commersonia bartramia</i>                      |                                     | KM894446                            | KM895028                             |

|              |                 |                                    |                                     |                                   |                                               |
|--------------|-----------------|------------------------------------|-------------------------------------|-----------------------------------|-----------------------------------------------|
| Malvales     | Malvaceae       | <i>Corchorus cunninghamii</i>      |                                     | KU564559                          | KU564658                                      |
| Boraginales  | Boraginaceae    | <i>Cordia aspera</i>               | Cordia_aspera_300601424*            | Cordia_aspera_300601424*          | Cordia_aspera_300601424*                      |
| Boraginales  | Boraginaceae    | <i>Cordia dichotoma</i>            | Cordia_dichotoma_300401229*         | KF496651                          | Cordia_dichotoma_300401229*                   |
| Boraginales  | Boraginaceae    | <i>Cordia subcordata</i>           | Cordia_subcordata_300601425*        | Cordia_subcordata_300601425*      | Cordia_subcordata_300601425*                  |
| Asparagales  | Asteliaceae     | <i>Cordyline cannifolia</i>        | Cordyline_cannifolia_300801595*     | KF496576                          | Cordyline_cannifolia_CERF125–10 <sup>cc</sup> |
| Asparagales  | Asteliaceae     | <i>Cordyline congesta</i>          | KM895607                            | KM894513                          |                                               |
| Asparagales  | Asteliaceae     | <i>Cordyline manners-suttoniae</i> | KM895557                            | KM894468                          |                                               |
| Asparagales  | Asteliaceae     | <i>Cordyline murchisoniae</i>      |                                     | KM894605                          | Cordyline_murchisoniae_1076419068**           |
| Asparagales  | Asteliaceae     | <i>Cordyline stricta</i>           | KU564785                            | KU564561                          | KU564660                                      |
| Asterales    | Asteraceae      | <i>Coronidium rupicola</i>         | Coronidium_rupicola_300601426*      |                                   | Coronidium_rupicola_300601426*                |
| Myrtales     | Myrtaceae       | <i>Corymbia gummifera</i>          | Corymbia_gummifera_300901721*       | KT632662                          | KT632098                                      |
| Myrtales     | Myrtaceae       | <i>Corymbia intermedia</i>         | Corymbia_intermedia_600300264*      | Corymbia_intermedia_600300264*    | Corymbia_intermedia_600300264*                |
| Myrtales     | Myrtaceae       | <i>Corymbia torelliana</i>         |                                     | KT632681                          | KT632123                                      |
| Myrtales     | Myrtaceae       | <i>Corymbia trachyphloia</i>       | Corymbia_trachyphloia_600300297*    | Corymbia_trachyphloia_600300297*  | Corymbia_trachyphloia_600300297*              |
| Asparagales  | Orchidaceae     | <i>Corymborkis veratrifolia</i>    | Corymborkis_veratrifolia_300801598* | AY557203                          |                                               |
| Cucurbitales | Corynocarpaceae | <i>Corynocarpus rupestris</i>      | KM895943                            | KM894780                          | Corynocarpus_rupestris_1076419045**           |
| Sapindales   | Sapindaceae     | <i>Cossinia australiana</i>        | KM895893                            | Cossinia_australiana_129308776**  |                                               |
| Asterales    | Asteraceae      | <i>Crassocephalum crepidioides</i> | MF135353                            | MF159418                          | MH621849                                      |
| Fabales      | Fabaceae        | <i>Crotalaria pallida</i>          | KY627429                            | MH552254                          |                                               |
| Malpighiales | Euphorbiaceae   | <i>Croton acronychioides</i>       | KM895770                            |                                   | Croton_acronychioides_129308502**             |
| Malpighiales | Euphorbiaceae   | <i>Croton arnhemicus</i>           | Croton_arnhemicus_300701546*        |                                   | Croton_arnhemicus_300701546*                  |
| Malpighiales | Euphorbiaceae   | <i>Croton insularis</i>            | KM896033                            | KM894861                          |                                               |
| Malpighiales | Euphorbiaceae   | <i>Croton magneticus</i>           | Croton_magneticus_300701535*        |                                   | Croton_magneticus_300701535*                  |
| Malpighiales | Euphorbiaceae   | <i>Croton phebaliioides</i>        | KM895663                            |                                   | KY039825                                      |
| Malpighiales | Euphorbiaceae   | <i>Croton stigmatosus</i>          | KM895853                            |                                   | Croton_stigmatosus_1076419055**               |
| Malpighiales | Euphorbiaceae   | <i>Croton triacros</i>             | Croton_triacros_300601427*          |                                   | Croton_triacros_300701547*                    |
| Malpighiales | Euphorbiaceae   | <i>Croton verreauxii</i>           | KM895498                            |                                   | KM895008                                      |
| Laurales     | Lauraceae       | <i>Cryptocarya angulata</i>        | KF496458                            | Cryptocarya_angulata_300701548*   | Cryptocarya_angulata_300701548*               |
| Laurales     | Lauraceae       | <i>Cryptocarya bidwillii</i>       | KM896094                            | KM894908                          |                                               |
| Laurales     | Lauraceae       | <i>Cryptocarya corrugata</i>       | Cryptocarya_corrugata_300701549*    | Cryptocarya_corrugata_300701549*  | Cryptocarya_corrugata_300701549*              |
| Laurales     | Lauraceae       | <i>Cryptocarya densiflora</i>      | JN564193                            | Cryptocarya_densiflora_300701550* | Cryptocarya_densiflora_300701550*             |
| Laurales     | Lauraceae       | <i>Cryptocarya erythroxylon</i>    | KM895966                            | KM894802                          |                                               |
| Laurales     | Lauraceae       | <i>Cryptocarya foetida</i>         | KM895569                            | KM894477                          |                                               |

|              |               |                                   |                                      |                                    |                                      |
|--------------|---------------|-----------------------------------|--------------------------------------|------------------------------------|--------------------------------------|
| Lurales      | Luraceae      | <i>Cryptocarya foveolata</i>      | KM895760                             | KM894640                           | KM895170                             |
| Lurales      | Luraceae      | <i>Cryptocarya glaucescens</i>    | KM896205                             | KM894992                           |                                      |
| Lurales      | Luraceae      | <i>Cryptocarya grandis</i>        | Cryptocarya_grandis_300701551*       | Cryptocarya_grandis_300701551*     | Cryptocarya_grandis_300701551*       |
| Lurales      | Luraceae      | <i>Cryptocarya hypospodia</i>     | KM895693                             | KM894582                           | KM895125                             |
| Lurales      | Luraceae      | <i>Cryptocarya laevigata</i>      | KM896075                             | KM894896                           |                                      |
| Lurales      | Luraceae      | <i>Cryptocarya leucophylla</i>    | Cryptocarya_leucophylla_300701552*   | Cryptocarya_leucophylla_300701552* | Cryptocarya_leucophylla_300701552*   |
| Lurales      | Luraceae      | <i>Cryptocarya lividula</i>       | Cryptocarya_lividula_300601429*      | JN564085                           | Cryptocarya_lividula_300601429*      |
| Lurales      | Luraceae      | <i>Cryptocarya macdonaldii</i>    | KM895919                             | KM894765                           | KM895258                             |
| Lurales      | Luraceae      | <i>Cryptocarya mackinniniana</i>  | Cryptocarya_mackinniniana_300601430* |                                    | Cryptocarya_mackinniniana_300601430* |
| Lurales      | Luraceae      | <i>Cryptocarya meisneriana</i>    |                                      | KM894557                           | KM895105                             |
| Lurales      | Luraceae      | <i>Cryptocarya microneura</i>     | KM896102                             | KM894917                           | Cryptocarya_microneura_129307898**   |
| Lurales      | Luraceae      | <i>Cryptocarya murrayi</i>        | Cryptocarya_murrayi_300401236*       |                                    | Cryptocarya_murrayi_300401236*       |
| Lurales      | Luraceae      | <i>Cryptocarya oblata</i>         | Cryptocarya_oblata_300601431*        |                                    | Cryptocarya_oblata_300601431*        |
| Lurales      | Luraceae      | <i>Cryptocarya obovata</i>        | KU564786                             | KU564562                           | KU564661                             |
| Lurales      | Luraceae      | <i>Cryptocarya onoprienkoana</i>  | KM896112                             | KM894925                           |                                      |
| Lurales      | Luraceae      | <i>Cryptocarya putida</i>         | Cryptocarya_putida_300601432*        | JN564100                           | Cryptocarya_putida_300601432*        |
| Lurales      | Luraceae      | <i>Cryptocarya rigida</i>         | KM895836                             | KM894697                           | Cryptocarya_rigida_1076420405**      |
| Lurales      | Luraceae      | <i>Cryptocarya saccharata</i>     | JN564223                             | JN564084                           |                                      |
| Lurales      | Luraceae      | <i>Cryptocarya sclerophylla</i>   | KM896070                             | KM894788                           |                                      |
| Lurales      | Luraceae      | <i>Cryptocarya triplinervis</i>   | KM895774                             | KM894649                           |                                      |
| Lurales      | Luraceae      | <i>Cryptocarya vulgaris</i>       | Cryptocarya_vulgaris_300601433*      | KU564563                           | Cryptocarya_vulgaris_300601433*      |
| Cucurbitales | Cucurbitaceae | <i>Cucumis picrocarpus</i>        | KY434430                             | KY458116                           |                                      |
| Sapindales   | Sapindaceae   | <i>Cupaniopsis anacardioides</i>  | GU135199                             | GU135037                           | GU135366                             |
| Sapindales   | Sapindaceae   | <i>Cupaniopsis baileyana</i>      | KM896167                             | KM894962                           |                                      |
| Sapindales   | Sapindaceae   | <i>Cupaniopsis flagelliformis</i> | KM895532                             | KM894452                           |                                      |
| Sapindales   | Sapindaceae   | <i>Cupaniopsis newmanii</i>       | KM895895                             | KM894743                           |                                      |
| Sapindales   | Sapindaceae   | <i>Cupaniopsis parvifolia</i>     | KM895864                             | KM894721                           |                                      |
| Sapindales   | Sapindaceae   | <i>Cupaniopsis serrata</i>        | KM896056                             | KM894879                           |                                      |
| Sapindales   | Sapindaceae   | <i>Cupaniopsis simulata</i>       | KM895952                             | KM894792                           |                                      |
| Sapindales   | Sapindaceae   | <i>Cupaniopsis wadsworthii</i>    |                                      | KM894581                           | KM895123                             |
| Sapindales   | Sapindaceae   | <i>Cupaniopsis Watalgin</i>       | KM895923                             | KM894767                           |                                      |
| Asterales    | Asteraceae    | <i>Cyanthillium cinereum</i>      | Cyanthillium_cinereum_600400490*     | Cyanthillium_cinereum_600400490*   | Cyanthillium_cinereum_600400490*     |

|                |                    |                                                                     |                                     |                                     |                                       |
|----------------|--------------------|---------------------------------------------------------------------|-------------------------------------|-------------------------------------|---------------------------------------|
| Cycadales      | Cycadaceae         | <i>Cycas media</i>                                                  |                                     | AF410162                            | KX182275                              |
| Gentianales    | Rubiaceae          | <i>Cyclophyllum coprosmoides</i>                                    | KM895699                            | KM894590                            | Cyclophyllum_coprosmoides_300201168*  |
| Gentianales    | Rubiaceae          | <i>Cyclophyllum longipetalum</i>                                    | KM896079                            |                                     | Cyclophyllum_longipetalum_129308468** |
| Gentianales    | Rubiaceae          | <i>Cyclophyllum multiflorum</i>                                     | Cyclophyllum_multiflorum_300701553* | Cyclophyllum_multiflorum_300701553* | Cyclophyllum_multiflorum_300601434*   |
| Poales         | Poaceae            | <i>Cymbopogon martinii</i>                                          | KT309057                            | KT309065                            | KT309049                              |
| Gentianales    | Apocynaceae        | <i>Cynanchum leptolepis</i>                                         | Cynanchum_leptolepis_300401237*     | Cynanchum_leptolepis_300401237*     | Cynanchum_leptolepis_300401237*       |
| Gentianales    | Apocynaceae        | <i>Cynanchum viminalis</i>                                          | KR737438                            | KR735082                            | KR735285                              |
| Poales         | Cyperaceae         | <i>Cyperus difformis</i>                                            | MH229850                            | KX369440                            | KX405741                              |
| Poales         | Cyperaceae         | <i>Cyperus exaltatus</i>                                            | MK285220                            | MK303567                            | MK261024                              |
| Poales         | Cyperaceae         | <i>Cyperus haspan</i>                                               | KY627291                            | KX369467                            | KX405765                              |
| Poales         | Cyperaceae         | <i>Cyperus involucratus</i>                                         | GU135273                            | GU135083                            | GU135444                              |
| Poales         | Cyperaceae         | <i>Cyperus javanicus</i>                                            | MH767527                            | MH767833                            |                                       |
| Poales         | Cyperaceae         | <i>Cyperus nutans</i>                                               | KX499529                            | KY386840                            |                                       |
| Poales         | Cyperaceae         | <i>Cyperus polystachyos</i>                                         | MF065477                            | KX369499                            | KX405796                              |
| Poales         | Cyperaceae         | <i>Cyperus</i> sp. ( <i>Eungella National Park</i> P.R.Sharpe+5052) | Cyperus_PRSharpe5052_300401238*     | Cyperus_PRSharpe5052_300401238*     |                                       |
| Poales         | Poaceae            | <i>Cyrtococcum oxyphyllum</i>                                       | KF496382                            | MG968372                            |                                       |
| Laurales       | Atherospermataceae | <i>Daphnandra apetalis</i>                                          | KU564789                            | KU564565                            | KU564665                              |
| Laurales       | Atherospermataceae | <i>Daphnandra tenuipes</i>                                          | KM895674                            |                                     | KM895109                              |
| Proteales      | Proteaceae         | <i>Darlingia darlingiana</i>                                        | Darlingia_darlingiana_300601435*    | JN564067                            | Darlingia_darlingiana_300601435*      |
| Oxalidales     | Cunoniaceae        | <i>Davidsonia johnsonii</i>                                         | KM895905                            | KM894752                            |                                       |
| Rosales        | Urticaceae         | <i>Debregeasia australis</i>                                        | Debregeasia_australis_300401240*    | Debregeasia_australis_300401240*    |                                       |
| Myrtales       | Myrtaceae          | <i>Decaspermum humile</i>                                           | KM895908                            | KM894754                            |                                       |
| Myrtales       | Myrtaceae          | <i>Decaspermum struckoileum</i>                                     | KM896037                            | KM894866                            | KM895327                              |
| Caryophyllales | Amaranthaceae      | <i>Deeringia amaranthoides</i>                                      | KM895505                            |                                     | KM895021                              |
| Caryophyllales | Amaranthaceae      | <i>Deeringia arborescens</i>                                        | KM896100                            | KM894915                            | Deeringia_arborescens_129308346**     |
| Rosales        | Urticaceae         | <i>Dendrocnide excelsa</i>                                          | KM895755                            | KM894636                            | Dendrocnide_excelsa_1076419116**      |
| Rosales        | Urticaceae         | <i>Dendrocnide moroides</i>                                         | KU564790                            | KU564566                            | KU564666                              |
| Rosales        | Urticaceae         | <i>Dendrocnide photinophylla</i>                                    | KM896183                            | KM894978                            | KM895413                              |
| Santalales     | Loranthaceae       | <i>Dendrophthoe curvata</i>                                         | Dendrophthoe_curvata_300901709*     |                                     | Dendrophthoe_curvata_300901709*       |
| Santalales     | Loranthaceae       | <i>Dendrophthoe varians</i> <sup>C</sup>                            | Dendrophthoe_curvata_300901709*     | EF464501                            |                                       |
| Celastrales    | Celastraceae       | <i>Denhamia bilocularis</i>                                         | KM895882                            | EU328991                            | KM895237                              |

|              |                  |                                           |                                            |                                            |                                            |
|--------------|------------------|-------------------------------------------|--------------------------------------------|--------------------------------------------|--------------------------------------------|
| Celastrales  | Celastraceae     | <i>Denhamia celastroides</i>              | KM895766                                   | KM894643                                   |                                            |
| Celastrales  | Celastraceae     | <i>Denhamia cunninghamii</i>              | Denhamia_cunninghamii_300101047*           | KU564567                                   | Denhamia_cunninghamii_300101047*           |
| Celastrales  | Celastraceae     | <i>Denhamia disperma</i>                  | Denhamia_disperma_300801616*               | Denhamia_disperma_300801616*               |                                            |
| Celastrales  | Celastraceae     | <i>Denhamia oleaster</i>                  | KU564791                                   | KU564568                                   | KU564667                                   |
| Celastrales  | Celastraceae     | <i>Denhamia parvifolia</i>                | KM895597                                   | KM894507                                   |                                            |
| Celastrales  | Celastraceae     | <i>Denhamia pittosporoides</i>            | KM895845                                   | KM894703                                   |                                            |
| Fabales      | Fabaceae         | <i>Derris involuta</i>                    | KM895570                                   |                                            | Derris_involuta_1076419051**               |
| Fabales      | Fabaceae         | <i>Derris trifoliata</i>                  | Derris_trifoliata_300401242*               | Derris_trifoliata_300401242*               |                                            |
| Fabales      | Fabaceae         | <i>Desmodium gunnii</i>                   | Desmodium_gunnii_600400492*                | Desmodium_gunnii_600400492*                | Desmodium_gunnii_600400492*                |
| Asparagales  | Xanthorrhoeaceae | <i>Dianella bambusifolia</i>              | Dianella_bambusifolia_300601436*           |                                            | Dianella_bambusifolia_300601436*           |
| Asparagales  | Xanthorrhoeaceae | <i>Dianella caerulea</i>                  |                                            | Dianella_caerulea_300201169*               | Dianella_caerulea_300201169*               |
| Asparagales  | Xanthorrhoeaceae | <i>Dianella fruticans</i>                 | Dianella_fruticans_300401243*              |                                            | Dianella_fruticans_300401243*              |
| Asparagales  | Xanthorrhoeaceae | <i>Dianella longifolia</i>                | Dianella_longifolia_600200017*             | Dianella_longifolia_600200017*             | Dianella_longifolia_600200017*             |
| Asparagales  | Xanthorrhoeaceae | <i>Dianella rara</i>                      | Dianella_rara_600300397*                   |                                            | Dianella_rara_600300397*                   |
| Poales       | Poaceae          | <i>Dichanthium aristatum</i>              | KC123357                                   | KC123403                                   |                                            |
| Poales       | Poaceae          | <i>Digitaria setigera</i>                 | MH767586                                   | MH767890                                   |                                            |
| Sapindales   | Sapindaceae      | <i>Dimocarpus australianus</i>            | Dimocarpus_australianus_300801580*         | Dimocarpus_australianus_300801580*         | Dimocarpus_australianus_300801580*         |
| Malpighiales | Euphorbiaceae    | <i>Dimorphocalyx australiensis</i>        | Dimorphocalyx_australiensis_300701555*     |                                            | Dimorphocalyx_australiensis_300701555*     |
| Poales       | Poaceae          | <i>Dinebra decipiens</i>                  | KJ768929                                   | KJ768893                                   |                                            |
| Sapindales   | Rutaceae         | <i>Dinosperma erythrococcum</i>           | KM896081                                   | KM894899                                   |                                            |
| Sapindales   | Rutaceae         | <i>Dinosperma melanophloia</i>            | KM895920                                   |                                            | KM895259                                   |
| Dioscoreales | Dioscoreaceae    | <i>Dioscorea bulbifera var. bulbifera</i> | Dioscorea_bulbifera_300401245*             | Dioscorea_bulbifera_300401245*             |                                            |
| Dioscoreales | Dioscoreaceae    | <i>Dioscorea transversa</i>               | Dioscorea_transversa_600400495 *           | Dioscorea_transversa_600400495 *           | Dioscorea_transversa_600400495 *           |
| Ericales     | Ebenaceae        | <i>Diospyros australi</i>                 | KM895885                                   | DQ923993                                   | FJ238214                                   |
| Ericales     | Ebenaceae        | <i>Diospyros compacta</i>                 | Diospyros_compacta_BATT506-10 <sup>#</sup> | Diospyros_compacta_BATT506-10 <sup>#</sup> | Diospyros_compacta_BATT506-10 <sup>#</sup> |
| Ericales     | Ebenaceae        | <i>Diospyros fasciculosa</i>              | KM895664                                   | KM894558                                   |                                            |
| Ericales     | Ebenaceae        | <i>Diospyros geminata</i>                 | Diospyros_geminata_300601439*              | Diospyros_geminata_300601439*              | Diospyros_geminata_129308724**             |
| Ericales     | Ebenaceae        | <i>Diospyros hebecarpa</i>                | Diospyros_hebecarpa_300401247*             | Diospyros_hebecarpa_300401247*             | Diospyros_hebecarpa_300401247*             |
| Ericales     | Ebenaceae        | <i>Diospyros humilis</i>                  | KM895848                                   | KM894708                                   |                                            |
| Ericales     | Ebenaceae        | <i>Diospyros pentamera</i>                | KM895790                                   | KM894661                                   | KM895186                                   |
| Santalales   | Loranthaceae     | <i>Diplatia furcata</i>                   | Diplatia_furcata_300801623*                | EU544425                                   | Diplatia_furcata_600300343*                |
| Cucurbitales | Cucurbitaceae    | <i>Diplocyclos palmatus</i>               | KM895605                                   | KM894512                                   | Diplocyclos_palmatus_1076419082**          |

|                |                    |                                           |                                      |                                     |                                       |
|----------------|--------------------|-------------------------------------------|--------------------------------------|-------------------------------------|---------------------------------------|
| Sapindales     | Sapindaceae        | <i>Diploglottis campbellii</i>            | KM896020                             | KM894849                            | Diploglottis_campbellii_1076419035**  |
| Sapindales     | Sapindaceae        | <i>Diploglottis obovata</i>               | Diploglottis_obovata_300401248*      | Diploglottis_obovata_300401248*     |                                       |
| Malpighiales   | Picrodendraceae    | <i>Dissiliaria baloghioides</i>           | KM895613                             | KM894517                            | Dissiliaria_baloghioides_1076419052** |
| Malpighiales   | Picrodendraceae    | <i>Dissiliaria indistincta</i>            | Dissiliaria_indistincta_300402249*   |                                     | Dissiliaria_indistincta_300402249*    |
| Malpighiales   | Picrodendraceae    | <i>Dissiliaria muelleri</i>               | KM895656                             |                                     | KM895100                              |
| Sapindales     | Sapindaceae        | <i>Dodonaea triquetra</i>                 | Dodonaea_triquetra_600100023*        | Dodonaea_triquetra_600100023*       | Dodonaea_triquetra_600100023*         |
| Sapindales     | Sapindaceae        | <i>Dodonaea viscosa</i>                   | KJ082273                             | KJ426704                            | KJ426704                              |
| Laurales       | Atherospermataceae | <i>Doryphora sassafras</i>                | KF586649                             | KM894871                            |                                       |
| Liliales       | Alstroemeriaceae   | <i>Drymophila moorei</i>                  | KM895894                             | KM894742                            | KM895246                              |
| Malpighiales   | Putranjivaceae     | <i>Drypetes acuminata</i>                 | Drypetes_acuminata_300601440*        |                                     | Drypetes_acuminata_300601440*         |
| Malpighiales   | Putranjivaceae     | <i>Drypetes deplanchei</i>                | KM895553                             |                                     | KM895046                              |
| Solanales      | Solanaceae         | <i>Duboisia leichhardtii</i>              | KM895868                             | KM894725                            | KM895228                              |
| Solanales      | Solanaceae         | <i>Duboisia myoporoides</i>               | KM895686                             | KM894576                            |                                       |
| Sapindales     | Meliaceae          | <i>Dysoxylum alliaceum</i>                | Dysoxylum_alliaceum_300601442*       | Dysoxylum_alliaceum_300601442*      |                                       |
| Sapindales     | Meliaceae          | <i>Dysoxylum gaudichaudianum</i>          | KM895857                             | KM894717                            |                                       |
| Sapindales     | Meliaceae          | <i>Dysoxylum klanderi</i>                 | Dysoxylum_klanderi_CERF123-10#       | Dysoxylum_klanderi_CERF123-10#      |                                       |
| Sapindales     | Meliaceae          | <i>Dysoxylum mollissimum</i>              | KM895735                             | KM894621                            |                                       |
| Sapindales     | Meliaceae          | <i>Dysoxylum oppositifolium</i>           | Dysoxylum_oppositifolium_Batt715-10* | Dysoxylum_oppositifolium_300601443* | Dysoxylum_oppositifolium_300601443*   |
| Sapindales     | Meliaceae          | <i>Dysoxylum papuanum</i>                 | JF738834                             | Dysoxylum_papuanum_BATT083-10#      | Dysoxylum_papuanum_300601444*         |
| Sapindales     | Meliaceae          | <i>Dysoxylum parasiticum</i>              | NH826729                             |                                     | MH826477                              |
| Sapindales     | Meliaceae          | <i>Dysoxylum rufum</i>                    | KM895879                             | KM894734                            | Dysoxylum_rufum_1076420291**          |
| Caryophyllales | Amaranthaceae      | <i>Dysphania carinata</i>                 | MF135426                             | MK290551                            | MF143743                              |
| Ranunculales   | Menispermaceae     | <i>Echinostephia aculeata</i>             | KM895873                             |                                     | KM895232                              |
| Asterales      | Asteraceae         | <i>Eclipta prostrata</i>                  | LC461823                             | LC461822                            | LC461824                              |
| Boraginales    | Boraginaceae       | <i>Ehretia acuminata</i>                  | KM896175                             | KM894971                            | KM895404                              |
| Boraginales    | Boraginaceae       | <i>Ehretia grahamii</i>                   | Ehretia_grahamii_300701482*          | Ehretia_grahamii_300701482*         | Ehretia_grahamii_300701482*           |
| Boraginales    | Boraginaceae       | <i>Ehretia saligna var. membranifolia</i> | KM895846                             | KM894705                            | KM895215                              |
| Caryophyllales | Amaranthaceae      | <i>Einadia hastata</i>                    | KM896088                             | KM894904                            |                                       |
| Caryophyllales | Amaranthaceae      | <i>Einadia nutans</i>                     | KM896090                             | KM894905                            |                                       |
| Rosales        | Elaeagnaceae       | <i>Elaeagnus triflora</i>                 | KU564794                             | KU564570                            | KU564670                              |
| Oxalidales     | Elaeocarpaceae     | <i>Elaeocarpus eumundi</i>                | KM895782                             |                                     | KM895180                              |
| Oxalidales     | Elaeocarpaceae     | <i>Elaeocarpus foveolatus</i>             | Elaeocarpus_foveolatus_300701556*    | Elaeocarpus_foveolatus_300701556*   | Elaeocarpus_foveolatus_300701556*     |

|                |                |                                             |                                      |                                     |                                         |
|----------------|----------------|---------------------------------------------|--------------------------------------|-------------------------------------|-----------------------------------------|
| Oxalidales     | Elaeocarpaceae | <i>Elaeocarpus grandis</i>                  | KM896149                             |                                     | KM895392                                |
| Oxalidales     | Elaeocarpaceae | <i>Elaeocarpus largiflorens</i>             | Elaeocarpus_largiflorens_300701557*  | JN564122                            | Elaeocarpus_largiflorens_300701557*     |
| Oxalidales     | Elaeocarpaceae | <i>Elaeocarpus obovatus</i>                 | KM895618                             | KM894521                            |                                         |
| Oxalidales     | Elaeocarpaceae | <i>Elaeocarpus reticulatus</i>              | Elaeocarpus_reticulatus_600400469*   | Elaeocarpus_reticulatus_600400469*  | Elaeocarpus_reticulatus_600400469*      |
| Oxalidales     | Elaeocarpaceae | <i>Elaeocarpus sericopetalus</i>            | Elaeocarpus_sericopetalus_300701558* |                                     | Elaeocarpus_sericopetalus_300701558*    |
| Celastrales    | Celastraceae   | <i>Elaeodendron australe</i>                | Elaeodendron_australe_300401254*     | KM894597                            | Elaeodendron_australe_300401254*        |
| Celastrales    | Celastraceae   | <i>Elaeodendron melanocarpum</i>            | KM895912                             | KM894757                            |                                         |
| Rosales        | Urticaceae     | <i>Elatostema reticulatum</i>               | Elatostema_reticulatum_300401255*    | Elatostema_reticulatum_BATT149-10#  | Elatostema_reticulatum_BATT149-10#      |
| Sapindales     | Sapindaceae    | <i>Elattostachys bidwillii</i>              | KM895850                             | KM894860                            | Elattostachys_bidwillii_1076420537**    |
| Sapindales     | Sapindaceae    | <i>Elattostachys megalantha</i>             |                                      | Elattostachys_megalantha_300601448* | Elattostachys_megalantha_300601448*     |
| Sapindales     | Sapindaceae    | <i>Elattostachys nervosa</i>                | KM896117                             |                                     | KM895375                                |
| Sapindales     | Sapindaceae    | <i>Elattostachys xylocarpa</i> <sup>c</sup> | KM895922                             | Elattostachys_megalantha_300601448* |                                         |
| Ericales       | Primulaceae    | <i>Embelia australiana</i>                  | Embelia_australiana_300601449*       | KM894445                            | Embelia_australiana_300601449*          |
| Asterales      | Asteraceae     | <i>Emilia sonchifolia</i>                   | MH767497                             | MH767805                            | MH621890                                |
| Rosales        | Rhamnaceae     | <i>Emmenosperma alphonseoides</i>           | KM895701                             | KM894592                            | Emmenosperma_alphonseoides_1076419050** |
| Rosales        | Rhamnaceae     | <i>Emmenosperma cunninghamii</i>            | KM895747                             | KM894630                            | Emmenosperma_cunninghamii_1076420365**  |
| Caryophyllales | Amaranthaceae  | <i>Enchylaena tomentosa</i>                 | MF828463                             | MF828479                            |                                         |
| Laurales       | Lauraceae      | <i>Endiandra bessaphila</i>                 | Endiandra_bessaphila_300601450*      |                                     | Endiandra_bessaphila_300601450*         |
| Laurales       | Lauraceae      | <i>Endiandra compressa</i>                  | KM896009                             | KM894837                            | KM895309                                |
| Laurales       | Lauraceae      | <i>Endiandra cowleyana</i>                  |                                      | Endiandra_cowleyana_BATT088-10#     | Endiandra_cowleyana_BATT088-11#         |
| Laurales       | Lauraceae      | <i>Endiandra crassiflora</i>                | KM895958                             | KM894797                            |                                         |
| Laurales       | Lauraceae      | <i>Endiandra dielsiana</i>                  | Endiandra_dielsiana_300401257*       |                                     | Endiandra_dielsiana_300401257*          |
| Laurales       | Lauraceae      | <i>Endiandra discolor</i>                   | KM896150                             |                                     | KM895394                                |
| Laurales       | Lauraceae      | <i>Endiandra hypotephra</i>                 | Endiandra_hypotephra_300701560*      | Endiandra_hypotephra_300701560*     | Endiandra_hypotephra_300701560*         |
| Laurales       | Lauraceae      | <i>Endiandra muelleri</i>                   | Endiandra_muelleri_300601452*        | KM894750                            | Endiandra_muelleri_300601452*           |
| Laurales       | Lauraceae      | <i>Endiandra pubens</i>                     | KM895865                             | KM894722                            | KM895225                                |
| Laurales       | Lauraceae      | <i>Endiandra sieberi</i>                    | KM896140                             | KM894944                            |                                         |
| Laurales       | Lauraceae      | <i>Endiandra wolfei</i>                     | Endiandra_wolfei_300701561*          | Endiandra_wolfei_300701561*         | Endiandra_wolfei_300701561*             |
| Fabales        | Fabaceae       | <i>Entada phaseoloides</i>                  | KF496514                             | HM049539                            |                                         |
| Poales         | Poaceae        | <i>Entolasia stricta</i>                    | Entolasia_stricta_600100026*         | HE574069                            | Entolasia_stricta_600100026*            |
| Alismatales    | Araceae        | <i>Epipremnum pinnatum</i>                  | Epipremnum_pinnatum_300801604*       | Epipremnum_pinnatum_300801604*      |                                         |
| Poales         | Poaceae        | <i>Eragrostis cilianensis</i>               | MF596765                             | MK294472                            | MK261046                                |



|              |                  |                                                      |                                     |                                     |                                      |
|--------------|------------------|------------------------------------------------------|-------------------------------------|-------------------------------------|--------------------------------------|
| Solanales    | Convolvulaceae   | <i>Erycibe coccinea</i>                              | Erycibe_coccinea_300401260*         | Erycibe_coccinea_BATT282-10#        | Erycibe_coccinea_BATT282-10#         |
| Fabales      | Fabaceae         | <i>Erythrina numerosa</i>                            | KM896084                            | MK263658                            | KM895353                             |
| Fabales      | Fabaceae         | <i>Erythrina variegata</i>                           | Erythrina_variegata_300701530*      | Erythrina_variegata_300701530*      | Erythrina_variegata_300701530*       |
| Fabales      | Fabaceae         | <i>Erythrina vespertilio</i>                         | KM895581                            |                                     | KM895062                             |
| Malpighiales | Erythroxylaceae  | <i>Erythroxylum</i> sp. (Splityard CreekPedley 5360) | KM896011                            | KM894840                            |                                      |
| Myrtales     | Myrtaceae        | <i>Eucalyptus crebra</i>                             |                                     | KT632799                            | KT632230                             |
| Myrtales     | Myrtaceae        | <i>Eucalyptus exserta</i>                            | Eucalyptus_exserta_600300311*       | Eucalyptus_exserta_600300311*       | Eucalyptus_exserta_600300311*        |
| Myrtales     | Myrtaceae        | <i>Eucalyptus moluccana</i>                          |                                     | KY596290                            | KY596194                             |
| Myrtales     | Myrtaceae        | <i>Eucalyptus resinifera</i>                         |                                     | KT633102                            | KT632513                             |
| Myrtales     | Myrtaceae        | <i>Eucalyptus resinifera</i> Xteriticornis           | Eucalyptus_robusta_600400513*       | Eucalyptus_robusta_600400513*       | Eucalyptus_robusta_600400513*        |
| Myrtales     | Myrtaceae        | <i>Eucalyptus siderophloia</i>                       | Eucalyptus_tereticornis_600400503*  | Eucalyptus_siderophloia_300201185*  |                                      |
| Myrtales     | Myrtaceae        | <i>Eucalyptus tereticornis</i>                       | Eucalyptus_tereticornis_600400503*  | Eucalyptus_tereticornis_600400503*  | Eucalyptus_tereticornis_600400503*   |
| Oxalidales   | Cunoniaceae      | <i>Eucryphia jinksii</i>                             | KM895544                            |                                     | KM895039                             |
| Myrtales     | Myrtaceae        | <i>Eugenia reinwardtiana</i>                         | KM895822                            | KM894685                            |                                      |
| Celastrales  | Celastraceae     | <i>Euonymus australiana</i>                          | Euonymus_australiana_300801619*     | Euonymus_australiana_300801619*     | Euonymus_australiana_300801619*      |
| Malpighiales | Euphorbiaceae    | <i>Euphorbia hirta</i>                               | MG889510                            | MG889542                            | MK415707                             |
| Magnoliales  | Eupomatiaceae    | <i>Eupomatia bennettii</i>                           |                                     | KU564574                            | KU564673                             |
| Magnoliales  | Eupomatiaceae    | <i>Eupomatia laurina</i>                             | KM895522                            | KM894442                            |                                      |
| Sapindales   | Anacardiaceae    | <i>Euroschinus falcatus</i> . var. <i>falcatus</i>   | KM895580                            | KM894490                            | KM895059                             |
| Liliales     | Alstroemeriaceae | <i>Eustrephus latifolius</i>                         | AY298831                            | KM894890                            | Eustrephus_latifolius_1076419100**   |
| Gentianales  | Rubiaceae        | <i>Everistia vacciniifolia</i>                       | KM896200                            | KM894948                            | Everistia_vacciniifolia_1076419066** |
| Solanales    | Convolvulaceae   | <i>Evolvulus alsinoides</i>                          | MH028857                            | KR734483                            | MK260732                             |
| Malpighiales | Euphorbiaceae    | <i>Excoecaria agallocha</i>                          | KY501144                            | KP725247                            |                                      |
| Malpighiales | Euphorbiaceae    | <i>Excoecaria dallachyana</i>                        | KM896154                            | KM894953                            |                                      |
| Santalales   | Santalaceae      | <i>Exocarpos cupressiformis</i>                      | Exocarpos_cupressiformis_300201157* | Exocarpos_cupressiformis_300201157* | Exocarpos_cupressiformis_300201157*  |
| Santalales   | Santalaceae      | <i>Exocarpos latifolius</i>                          | KM896101                            | KM894916                            |                                      |
| Poales       | Cyperaceae       | <i>Exocarya sclerioides</i>                          | KF496341                            | Exocarya_sclerioides_BATT327-10#    |                                      |
| Gentianales  | Gentianaceae     | <i>Fagraea fagraeacea</i>                            | Fagraea_fagraeacea_300601454*       |                                     | Fagraea_fagraeacea_300601454         |
| Fabales      | Fabaceae         | <i>Falcataria toona</i>                              | Falcataria_toona_300701562*         | Falcataria_toona_300701562*         | Falcataria_toona_300701562*          |
| Rosales      | Moraceae         | <i>Ficus adenosperma</i>                             | KM895621                            | KM894523                            | Ficus_adenosperma_1076420324**       |
| Rosales      | Moraceae         | <i>Ficus congesta</i> var. <i>congesta</i>           | Ficus_congesta_300701563*           |                                     | Ficus_congesta_300701563*            |
| Rosales      | Moraceae         | <i>Ficus copiosa</i>                                 | Ficus_copiosa_300601456*            |                                     | Ficus_copiosa_300601456*             |
| Rosales      | Moraceae         | <i>Ficus coronata</i>                                | KM895539                            | KM894457                            | KM895036                             |

|              |                 |                                                     |                                    |                                    |
|--------------|-----------------|-----------------------------------------------------|------------------------------------|------------------------------------|
| Rosales      | Moraceae        | <i>Ficus destruens</i>                              | Ficus_destruens_300701564*         | Ficus_destruens_300701564*         |
| Rosales      | Moraceae        | <i>Ficus drupacea</i>                               | JX571831                           | JX495713                           |
| Rosales      | Moraceae        | <i>Ficus fraseri</i>                                | KM896055                           | KM894878                           |
| Rosales      | Moraceae        | <i>Ficus hispida</i> var. <i>hispida</i>            | Ficus_hispida_300401266*           | Ficus_hispida_300401266*           |
| Rosales      | Moraceae        | <i>Ficus leptoclada</i>                             | Ficus_leptoclada_300401267*        | Ficus_leptoclada_300401267*        |
| Rosales      | Moraceae        | <i>Ficus macrophylla</i>                            | KM895608                           | KM894514                           |
| Rosales      | Moraceae        | <i>Ficus microcarpa</i> var. <i>microcarpa</i>      | KM895698.                          | KM894588                           |
| Rosales      | Moraceae        | <i>Ficus obliqua</i>                                |                                    | KM894609                           |
| Rosales      | Moraceae        | <i>Ficus opposita</i>                               | KM895642                           | KM894541                           |
| Rosales      | Moraceae        | <i>Ficus racemosa</i>                               | KM894609                           | KC508603                           |
| Rosales      | Moraceae        | <i>Ficus rubiginosa</i> forma <i>rubiginosa</i>     | Ficus_rubiginosa_300801602*        | KM894812                           |
| Rosales      | Moraceae        | <i>Ficus septica</i> var. <i>septica</i>            | Ficus_septica_300401269            | Ficus_septica_300401269*           |
| Rosales      | Moraceae        | <i>Ficus superba</i>                                | KM896074                           | KM894895                           |
| Rosales      | Moraceae        | <i>Ficus variegata</i>                              | ficus_variegata_300601455*         | ficus_variegata_300601455*         |
| Rosales      | Moraceae        | <i>Ficus virens</i>                                 | KM895727                           | KM895147                           |
| Poales       | Cyperaceae      | <i>Fimbristylis dichotoma</i>                       | MN623749                           | KX036924                           |
| Poales       | Cyperaceae      | <i>Fimbristylis pauciflora</i>                      | Fimbristylis_pauciflora_600100029* | Fimbristylis_pauciflora_600100029* |
| Magnoliales  | Annonaceae      | <i>Fitzalania bidwillii</i>                         | KM895495                           | KM894420                           |
| Magnoliales  | Annonaceae      | <i>Fitzalania heteropetala</i>                      | Fitzalania_heteropetala_300401270* | Fitzalania_heteropetala_300401270* |
| Poales       | Flagellariaceae | <i>Flagellaria indica</i> <sup>C</sup>              | KM895967                           | KX146313                           |
| Sapindales   | Rutaceae        | <i>Flindersia australis</i> <sup>C</sup>            | KM895803                           | KM894714                           |
| Sapindales   | Rutaceae        | <i>Flindersia bennettiana</i>                       | KM895771                           | KM894646                           |
| Sapindales   | Rutaceae        | <i>Flindersia brayleyana</i>                        | Flindersia_brayleyana_300601457*   | Flindersia_brayleyana_BATT652-10#  |
| Sapindales   | Rutaceae        | <i>Flindersia collina</i>                           | KM895860                           | KM895220                           |
| Sapindales   | Rutaceae        | <i>Flindersia pimenteliana</i>                      | Flindersia_pimenteliana_300601458* | JN564137                           |
| Sapindales   | Rutaceae        | <i>Flindersia schottiana</i>                        | KM895854                           | KM894714                           |
| Sapindales   | Rutaceae        | <i>Flindersia xanthoxyla</i>                        | KM895783                           | KM895181                           |
| Proteales    | Proteaceae      | <i>Floydia praealta</i>                             | KM895680                           | KM895114                           |
| Malpighiales | Phyllanthaceae  | <i>Flueggea leucopyrus</i>                          | KU564798                           | KU564575                           |
| Malpighiales | Phyllanthaceae  | <i>Flueggea virosa</i> subsp. <i>melanthesoides</i> | Flueggea_virosa_300801596*         | Flueggea_virosa_300801596*         |
| Malpighiales | Euphorbiaceae   | <i>Fontainea venosa</i>                             | KM895889                           | KM894741                           |
| Pandanales   | Pandanaceae     | <i>Freycinetia excelsa</i>                          | Freycinetia_excelsa_300401271*     | KU564576                           |
| Pandanales   | Pandanaceae     | <i>Freycinetia scandens</i>                         | KU564801                           | KU564577                           |

|              |                  |                                                             |                                   |                                   |                                   |
|--------------|------------------|-------------------------------------------------------------|-----------------------------------|-----------------------------------|-----------------------------------|
| Poales       | Cyperaceae       | <i>Gahnia aspera</i>                                        | Gahnia_aspera_300401272*          | Gahnia_aspera_300401272*          |                                   |
| Poales       | Cyperaceae       | <i>Gahnia clarkei</i>                                       | Gahnia_clarkei_600100030*         | Gahnia_sieberiana_600400516*      |                                   |
| Poales       | Cyperaceae       | <i>Gahnia sieberiana</i>                                    | Gahnia_sieberiana_600400516*      | Gahnia_sieberiana_600400516*      |                                   |
| Magnoliales  | Himantandraceae  | <i>Galbulimima baccata</i>                                  | KM895992                          | KM895299                          | KM894826                          |
| Sapindales   | Sapindaceae      | <i>Ganophyllum falcatum</i>                                 | KF416396                          | EU720634                          |                                   |
| Sapindales   | Rutaceae         | <i>Geijera parviflora</i>                                   | KM896148                          |                                   | KM895391                          |
| Sapindales   | Rutaceae         | <i>Geijera salicifolia</i>                                  | KM895677                          | KM894569                          | KM895111                          |
| Oxalidales   | Cunoniaceae      | <i>Geissois benthamii</i>                                   | KM895871                          | KM894727                          | KM895230                          |
| Liliales     | Alstroemeriaceae | <i>Geitonoplesium cymosum</i>                               | Geitonoplesium_cymosum_600100031* | Geitonoplesium_cymosum_600100031* | Geitonoplesium_cymosum_600100031* |
| Gentianales  | Rubiaceae        | <i>Gen.(AQ520454) sp. (Shute Harbour D.A.Halford Q811)</i>  | Randia_shuteHarbour_300401274*    | Randia_shuteHarbour_300401274*    |                                   |
| Gentianales  | Loganiaceae      | <i>Geniostoma rupestre var. australianum</i>                | Freycinetia_excelsa_300402275*    | KU564579                          |                                   |
| Asparagales  | Orchidaceae      | <i>Geodorum densiflorum</i>                                 | Geodorum_densiflorum_300801578*   | Geodorum_densiflorum_300801578*   | Geodorum_densiflorum_300801578*   |
| Gentianales  | Rubiaceae        | <i>Geophila repens</i>                                      | Geophila_repens_300401276         | KX911172                          |                                   |
| Malpighiales | Phyllanthaceae   | <i>Glochidion disparipes</i>                                | Glochidion_disparipes_300701566*  | Glochidion_disparipes_300701566*  | Glochidion_disparipes_300701566*  |
| Malpighiales | Phyllanthaceae   | <i>Glochidion ferdinandi</i>                                | KM895971                          | KM894806                          | Glochidion_ferdinandi_107642048** |
| Malpighiales | Phyllanthaceae   | <i>Glochidion harveyanum var. harveyanum</i>                | Glochidion_harveyanum_300601460*  | Glochidion_harveyanum_BATT441-10# | Glochidion_harveyanum_300601460*  |
| Malpighiales | Phyllanthaceae   | <i>Glochidion sumatranum</i>                                | KM896005                          | KM894833                          | KM895306                          |
| Lamiales     | Lamiaceae        | <i>Glossocarya hemiderma</i>                                | KM895963                          | MF801720                          |                                   |
| Fabales      | Fabaceae         | <i>Glycine sp. Marburg (K.A.Williams 83006)<sup>c</sup></i> | U74197                            | KU564580                          |                                   |
| Sapindales   | Rutaceae         | <i>Glycosmis trifoliata</i>                                 | Glycosmis_trifoliata_300701567*   | Glycosmis_trifoliata_300701567*   | Glycosmis_trifoliata_300701567*   |
| Lamiales     | Lamiaceae        | <i>Gmelina leichhardtii</i>                                 | KM895938                          | KM894778                          |                                   |
| Gentianales  | Apocynaceae      | <i>Gomphocarpus physocarpus</i>                             | MH749185                          | MH749021                          | MH749276                          |
| Saxifragales | Haloragaceae     | <i>Gonocarpus chinensis</i>                                 | Gonocarpus_chinensis_600400444*   | KC988290                          | Gonocarpus_chinensis_600400444*   |
| Myrtales     | Myrtaceae        | <i>Gossia acmenoides</i>                                    | KM895968                          | KM894803                          |                                   |
| Myrtales     | Myrtaceae        | <i>Gossia bidwillii</i>                                     | Gossia_bidwillii_300601466*       | KM894524                          | Gossia_bidwillii_300601466*       |
| Myrtales     | Myrtaceae        | <i>Gossia fragrantissima</i>                                | KM895980                          |                                   | KM895290                          |
| Myrtales     | Myrtaceae        | <i>Gossia hillii</i>                                        | KU564807                          | Gossia_hillii_1076418193**        | Gossia_hillii_1076418193**        |
| Myrtales     | Myrtaceae        | <i>Gossia inophloia</i>                                     | KM896181                          |                                   | KM895411                          |
| Myrtales     | Myrtaceae        | <i>Gossia myrsinocarpa</i>                                  | Gossia_myrsinocarpa_300701568*    | Gossia_myrsinocarpa_300701568*    | Gossia_myrsinocarpa_300701568*    |
| Myrtales     | Myrtaceae        | <i>Gossia pubiflora<sup>c</sup></i>                         | KU564807                          |                                   | MH587088                          |
| Myrtales     | Myrtaceae        | <i>Gossia shepherdii</i>                                    | Gossia_shepherdii_30060146*       | Gossia_shepherdii_BATT666-10#     | Gossia_shepherdii_BATT666-10#     |
| Myrtales     | Myrtaceae        | <i>Gossia sp.</i>                                           | Gossia_sp_300901671*              |                                   | Gossia_sp_300901671*              |

|             |               |                                  |                                      |                                  |                                      |
|-------------|---------------|----------------------------------|--------------------------------------|----------------------------------|--------------------------------------|
| Lamiales    | Acanthaceae   | <i>Graptophyllum excelsum</i>    | KM895585                             | KM894495                         | KM895065                             |
| Lamiales    | Acanthaceae   | <i>Graptophyllum ilicifolium</i> | Graptophyllum_ilicifolium_300401284* |                                  | Graptophyllum_ilicifolium_300401284* |
| Lamiales    | Acanthaceae   | <i>Graptophyllum reticulatum</i> | KM895711                             |                                  | KM895136                             |
| Lamiales    | Acanthaceae   | <i>Graptophyllum</i> sp.         | Graptophyllum_sp_300901691*          |                                  | Graptophyllum_sp_300901691*          |
| Proteales   | Proteaceae    | <i>Grevillea helmsiae</i>        | KM895700                             | KM894591                         | KM895129                             |
| Proteales   | Proteaceae    | <i>Grevillea hillianae</i>       | KM895833                             | KM894695                         | KM895208                             |
| Proteales   | Proteaceae    | <i>Grevillea robusta</i>         | KM895690                             | KM894579                         | KM895122                             |
| Malvales    | Malvaceae     | <i>Grewia australis</i>          | Grewia_australis_300401285*          | Grewia_australis_300401285*      |                                      |
| Malvales    | Malvaceae     | <i>Grewia graniticola</i>        | Grewia_graniticola_300402286*        |                                  | Grewia_graniticola_300402286*        |
| Malvales    | Malvaceae     | <i>Grewia latifolia</i>          | KM895817                             | KM894682                         | Grewia_latifolia_1076419090**        |
| Malvales    | Malvaceae     | <i>Grewia oxyphylla</i>          | Grewia_oxyphylla_300601469*          | Grewia_oxyphylla_300601468*      | Grewia_oxyphylla_300601468*          |
| Malvales    | Malvaceae     | <i>Grewia retusifolia</i>        | Grewia_retusifolia_300801608*        | Grewia_retusifolia_300801608*    | Grewia_retusifolia_300801608*        |
| Malvales    | Malvaceae     | <i>Grewia scabrella</i>          | Grewia_scabrella_300701532*          | Grewia_scabrella_300701532*      | Grewia_scabrella_300701532*          |
| Gentianales | Rubiaceae     | <i>Guettarda speciosa</i>        | Guettarda_speciosa_300601470*        | Guettarda_speciosa_300601470*    | Guettarda_speciosa_300601470*        |
| Fabales     | Fabaceae      | <i>Guilandina bonduc</i>         | LC461883                             | MK244354                         | MK578164                             |
| Fabales     | Surianaceae   | <i>Guilfoylia monostylis</i>     | KM895638                             | KM894538                         | Guilfoylia_monostylis_1076420544**   |
| Sapindales  | Sapindaceae   | <i>Guioa acutifolia</i>          | Guioa_acutifolia_300601471*          | Guioa_acutifolia_1076420560**    | Guioa_acutifolia_300601471*          |
| Sapindales  | Sapindaceae   | <i>Guioa lasioneura</i>          | Guioa_lasioneura_300701569*          | Guioa_lasioneura_300701569*      | Guioa_lasioneura_300701569*          |
| Sapindales  | Sapindaceae   | <i>Guioa montana</i>             | Guioa_montana_300601472*             |                                  | Guioa_montana_300601472*             |
| Sapindales  | Sapindaceae   | <i>Guioa semiglauca</i>          | KM896064                             | KM894888                         | KM895345                             |
| Gentianales | Apocynaceae   | <i>Gymnanthera oblonga</i>       | KU564808                             | KU564582                         | KU564677                             |
| Alismatales | Araceae       | <i>Gymnostachys anceps</i>       | KF496572                             | KM894795                         | KM895275                             |
| Gentianales | Rubiaceae     | <i>Gynochthodes canthoides</i>   | KM895637                             |                                  | Morinda_canthoides_1076420464*       |
| Gentianales | Rubiaceae     | <i>Gynochthodes jasminoides</i>  | KM895725                             | KM894613                         | KM895145                             |
| Gentianales | Rubiaceae     | <i>Gynochthodes sessilis</i>     | Gynochthodes_sessilis_300601474*     | Gynochthodes_sessilis_300601474* |                                      |
| Gentianales | Rubiaceae     | <i>Gynochthodes umbellata</i>    | KU564809                             | KU564583                         | KU564678                             |
| Laurales    | Hernandiaceae | <i>Gyrocarpus americanus</i>     | KM895937                             | AJ581417                         | GQ131060                             |
| Sapindales  | Rutaceae      | <i>Halfordia kendack</i>         | Halfordia_kendack_300601475*         | Halfordia_kendack_BATT279-10#    | KF496289                             |
| Fabales     | Fabaceae      | <i>Hanslia ormocarpoides</i>     | Hanslia_ormocarpoides_300601476*     | Hanslia_ormocarpoides_300601476* |                                      |
| Fabales     | Fabaceae      | <i>Hardenbergia violacea</i>     | Hardenbergia_violacea_600300379*     | Hardenbergia_violacea_600300379* | Hardenbergia_violacea_600300379*     |
| Lamiales    | Acanthaceae   | <i>Harnieria hygrophiloides</i>  | KM895702                             | KM894593                         | KM895130                             |
| Sapindales  | Sapindaceae   | <i>Harpullia alata</i>           | KM895671                             | KM894565                         | KM895108                             |

|              |                |                                         |                                       |                                        |                                       |
|--------------|----------------|-----------------------------------------|---------------------------------------|----------------------------------------|---------------------------------------|
| Sapindales   | Sapindaceae    | <i>Harpullia hillii</i>                 | KM895754                              | KM894635                               | KM895167                              |
| Sapindales   | Sapindaceae    | <i>Harpullia pendula</i>                | KM895805                              | KM894673                               | KM895193                              |
| Celastrales  | Celastraceae   | <i>Hedraianthera porphyropetala</i>     | KM895874                              | KM894729                               |                                       |
| Laurales     | Monimiaceae    | <i>Hedycarya loxocarya</i>              | Hedycarya_loxocarya_300601477*        | Hedycarya_loxocarya_300601477*         | Hedycarya_loxocarya_300601477*        |
| Proteales    | Proteaceae     | <i>Helicia ferruginea</i>               | KM895953                              | KM894793                               |                                       |
| Proteales    | Proteaceae     | <i>Helicia glabriflora</i> <sup>C</sup> | KM895778                              | Helicia_lamingtoniana_300601478*       |                                       |
| Proteales    | Proteaceae     | <i>Helicia lamingtoniana</i>            | Helicia_lamingtoniana_300601478*      | Helicia_lamingtoniana_300601478*       |                                       |
| Boraginales  | Boraginaceae   | <i>Heliotropium muelleri</i>            | Heliotropium_muelleri_300801592*      | Heliotropium_muelleri_300801592*       |                                       |
| Boraginales  | Boraginaceae   | <i>Heliotropium sarmentosum</i>         | Heliotropium_sarmentosum_300601479*   | Heliotropium_sarmentosum_300601479*    | Heliotropium_sarmentosum_300601479*   |
| Malvales     | Malvaceae      | <i>Heritiera littoralis</i>             | KF496435                              | MH332533                               | KJ559427                              |
| Laurales     | Hernandiaceae  | <i>Hernandia bivalvis</i>               | KM895684                              | KM894574                               | KM895117                              |
| Poales       | Poaceae        | <i>Heteropogon contortus</i>            | MH767596                              | MH767899                               |                                       |
| Gentianales  | Apocynaceae    | <i>Heterostemma acuminatum</i>          | KU564810                              | KU564584                               |                                       |
| Dilleniales  | Dilleniaceae   | <i>Hibbertia linearis</i>               | Hibbertia_linearis_600200251*         |                                        | Hibbertia_linearis_600200251*         |
| Dilleniales  | Dilleniaceae   | <i>Hibbertia scandens</i>               | Hibbertia_scandens_600400506*         | KT869267                               | Hibbertia_scandens_600400506*         |
| Dilleniales  | Dilleniaceae   | <i>Hibbertia vestita</i>                | Hibbertia_vestita_600300385*          | Hibbertia_vestita_600300385*           |                                       |
| Malvales     | Malvaceae      | <i>Hibiscus heterophyllus</i>           | KM895970                              | KM895281                               | KM894805                              |
| Malvales     | Malvaceae      | <i>Hibiscus splendens</i>               | KM895602                              | KM894510                               |                                       |
| Malvales     | Malvaceae      | <i>Hibiscus tiliaceus</i>               | KM896032                              |                                        | KM895323                              |
| Proteales    | Proteaceae     | <i>Hicksbeachia pinnatifolia</i>        | KM895899                              |                                        | Hicksbeachia_pinnatifolia_129307914** |
| Celastrales  | Celastraceae   | <i>Hippocratea barbata</i>              | KM895738                              | KM894624                               | KM895156                              |
| Gentianales  | Rubiaceae      | <i>Hodgkinsonia ovatiflora</i>          | Hodgkinsonia_ovatiflora_300501290     | KM894873                               | KM895334                              |
| Malpighiales | Euphorbiaceae  | <i>Homalanthus novoguineensis</i>       | Homalanthus_novoguineensis_300601480* | Homalanthus_novoguineensis_BATT672-10# | Homalanthus_novoguineensis_300601480* |
| Malpighiales | Euphorbiaceae  | <i>Homalanthus nutans</i>               | KM896071                              | AB268061                               |                                       |
| Malpighiales | Salicaceae     | <i>Homalium alnifolium</i>              | KM895964                              | KM894800                               |                                       |
| Fabales      | Fabaceae       | <i>Hovea acutifolia</i>                 | Hovea_acutifolia_600200001*           | KM894688                               | Hovea_acutifolia_600200001*           |
| Fabales      | Fabaceae       | <i>Hovea longipes</i>                   | KM895825                              | KM894688                               |                                       |
| Gentianales  | Apocynaceae    | <i>Hoya australis</i>                   | Hoya_australis_600400487*             | Hoya_australis_600400487*              | Hoya_australis_600400487*             |
| Gentianales  | Apocynaceae    | <i>Hoya pottsii</i>                     | Hoya_pottsii_300501293*               | Hoya_pottsii_300501293*                |                                       |
| Malpighiales | Violaceae      | <i>Hybanthus enneaspermus</i>           | AB354418                              | Hybanthus_enneaspermus                 | HM483574                              |
| Apiales      | Araliaceae     | <i>Hydrocotyle pedicellosa</i>          | KM895590                              | KM894501                               | KM895069                              |
| Apiales      | Pittosporaceae | <i>Hymenosporum flavum</i>              | KM896163                              | KM894958                               |                                       |

|              |                |                                   |                                       |                                       |                                       |
|--------------|----------------|-----------------------------------|---------------------------------------|---------------------------------------|---------------------------------------|
| Lamiales     | Acanthaceae    | <i>Hypoestes floribunda</i>       | Hypoestes_floribunda_300801594*       | Hypoestes_floribunda_300801589*       | Hypoestes_floribunda_300801594*       |
| Ranunculales | Menispermaceae | <i>Hypserpa decumbens</i>         | KM895955                              | KM894794                              | KM895274                              |
| Ranunculales | Menispermaceae | <i>Hypserpa laurina</i>           | Hypserpa_laurina_300701570*           | Hypserpa_laurina_300701570*           | Hypserpa_laurina_300701570*           |
| Gentianales  | Apocynaceae    | <i>Ichnocarpus frutescens</i>     | Ichnocarpus_frutescens_300501295*     | Ichnocarpus_frutescens_300501295*     | Ichnocarpus_frutescens_300501295*     |
| Poales       | Poaceae        | <i>Imperata cylindrica</i>        | Imperata_cylindrica_600400518*        | EF137462                              | Imperata_cylindrica_600400518*        |
| Fabales      | Fabaceae       | <i>Indigofera hirsuta</i>         | MH549882                              | MH621717                              | MH62194                               |
| Fabales      | Fabaceae       | <i>Intsia bijuga</i>              | Intsia_bijuga_300501296*              | Intsia_bijuga_300501296*              | Intsia_bijuga_300501296*              |
| Solanales    | Convolvulaceae | <i>Ipomoea abrupta</i>            | Ipomoea_abrupta_300901648*            | Ipomoea_abrupta_300901648*            | Ipomoea_abrupta_300901648*            |
| Solanales    | Convolvulaceae | <i>Ipomoea mauritiana</i>         | Ipomoea_mauritiana_300501297*         | Ipomoea_mauritiana_300501297*         | Ipomoea_mauritiana_300501297*         |
| Solanales    | Convolvulaceae | <i>Ipomoea violacea</i>           | MH767522                              | MH767829                              |                                       |
| Poales       | Poaceae        | <i>Ischaemum australe</i>         | Ischaemum_australe_600300318*         |                                       | Ischaemum_australe_600300318*         |
| Gentianales  | Rubiaceae      | <i>Ixora beckleri</i>             | KM896007                              | KM894836                              |                                       |
| Gentianales  | Rubiaceae      | <i>Ixora queenslandica</i>        |                                       | KM894707                              | KM895216                              |
| Solanales    | Convolvulaceae | <i>Jacquemontia pentanthos</i>    | MH549889                              | MH633674                              | DQ994729                              |
| Sapindales   | Sapindaceae    | <i>Jagera pseudorhus</i>          | KM895976                              | AY724306                              | KM895285                              |
| Lamiales     | Oleaceae       | <i>Jasminum dallachii</i>         | Jasminum_dallachii_300501299*         | Jasminum_dallachii_300501299*         | Jasminum_dallachii_300501299*         |
| Lamiales     | Oleaceae       | <i>Jasminum didymum</i>           | Jasminum_didymum_300601404*           | Jasminum_didymum_300601404*           | Jasminum_didymum_300601404*           |
| Lamiales     | Oleaceae       | <i>Jasminum jenniae</i>           | KM895689                              | KM894578                              |                                       |
| Lamiales     | Oleaceae       | <i>Jasminum simplicifolium</i>    | KU564811                              | KM894814                              | KM895289                              |
| Lamiales     | Oleaceae       | <i>Jasminum singuliflorum</i>     | KM895678                              | KM894571                              |                                       |
| Arecales     | Arecaceae      | <i>Laccospadix australasicus</i>  | Laccospadix_australasicus_300601428*  | Laccospadix_australasicus_300601428*  |                                       |
| Gentianales  | Rubiaceae      | <i>Larsenaikia jardinei</i>       | Larsenaikia_jardinei_300601437*       | Larsenaikia_jardinei_300601437*       | Larsenaikia_jardinei_300601437*       |
| Vitales      | Vitaceae       | <i>Leea guineensis</i>            | KT735203                              | Leea_guineensis_300501301*            | KJ687371                              |
| Vitales      | Vitaceae       | <i>Leea indica</i>                |                                       | Leea_indica_300701571*                | Leea_indica_300701571*                |
| Ranunculales | Menispermaceae | <i>Legnephora moorei</i>          | KM895881                              | KM894736                              | KM895236                              |
| Myrtales     | Myrtaceae      | <i>Lenwebbia lasioclada</i>       | KF496306                              |                                       | KX509967                              |
| Myrtales     | Myrtaceae      | <i>Lenwebbia prominens</i>        | KU564812                              |                                       | KM895153                              |
| Sapindales   | Sapindaceae    | <i>Lepiderema punctulata</i>      | Lepiderema_punctulata_300601438*      | KM894689                              |                                       |
| Poales       | Cyperaceae     | <i>Lepidosperma laterale</i>      | Lepidosperma_laterale_600200019*      | LT900078                              | Lepidosperma_laterale_600400391*      |
| Lamiales     | Lamiaceae      | <i>Leucas decemdentata</i>        | Leucas_decemdentata_300501303*        | Leucas_decemdentata_300501303*        | Leucas_decemdentata_300501303*        |
| Ericales     | Ericaceae      | <i>Leucopogon leptospermoides</i> | Leucopogon_leptospermoides_300201173* | Leucopogon_leptospermoides_300201173* | Leucopogon_leptospermoides_300201173* |
| Ericales     | Ericaceae      | <i>Leucopogon margarodes</i>      | Leucopogon_margarodes_300201163*      | Leucopogon_margarodes_300201174*      | Leucopogon_margarodes_300201174*      |

|              |               |                                                 |                                       |                                       |                                      |
|--------------|---------------|-------------------------------------------------|---------------------------------------|---------------------------------------|--------------------------------------|
| Ericales     | Ericaceae     | <i>Leucopogon mitchellii</i>                    | KU564815                              |                                       | KU564681                             |
| Lamiales     | Oleaceae      | <i>Ligustrum australianum</i>                   | KM895515                              |                                       | KM895017                             |
| Arecales     | Arecaceae     | <i>Linospadix monostachya</i>                   | KM895799                              | KM894668                              |                                      |
| Asparagales  | Orchidaceae   | <i>Liparis nervosa</i>                          | KU748315                              | KU748300                              | KF262204                             |
| Laurales     | Lauraceae     | <i>Litsea connorsii</i>                         | Litsea_connorsii_BAtt895-10#          | JN564119                              | Litsea_connorsii_300601445*          |
| Laurales     | Lauraceae     | <i>Litsea glutinosa</i>                         | Litsea_glutinosa_300701572*           | Litsea_glutinosa_300701572*           |                                      |
| Laurales     | Lauraceae     | <i>Litsea leefeana</i>                          | KM895736                              | KM894622                              | Litsea_leefeana_129308487**          |
| Laurales     | Lauraceae     | <i>Litsea reticulata</i>                        | KM895502                              | KM894425                              | Litsea_reticulata_129307799**        |
| Laurales     | Lauraceae     | <i>Litsea sp.</i>                               | Litsea_sp_300901669*                  |                                       | Litsea_sp_300901669*                 |
| Arecales     | Arecaceae     | <i>Livistona australis</i>                      | KM896109                              | KM894923                              |                                      |
| Arecales     | Arecaceae     | <i>Livistona decora</i>                         | KM896082                              | KM894900                              |                                      |
| Asparagales  | Asparagaceae  | <i>Lomandra confertifolia</i>                   | Lomandra_confertifolia_600200269*     | Lomandra_confertifolia_600200269*     | Lomandra_confertifolia_600200269*    |
| Asparagales  | Asparagaceae  | <i>Lomandra elongata</i>                        | Lomandra_elongata_600200213*          |                                       | Lomandra_elongata_600200213*         |
| Asparagales  | Asparagaceae  | <i>Lomandra hystrix</i>                         | KM895490                              | KM894415                              | KM895002                             |
| Asparagales  | Asparagaceae  | <i>Lomandra longifolia</i>                      | Lomandra_filiformis_600400527*        | Lomandra_filiformis_600400527*        | Lomandra_filiformis_600400527*       |
| Proteales    | Proteaceae    | <i>Lomatia arborescens</i>                      | KM896115                              | KM894927                              | KM895374                             |
| Myrtales     | Myrtaceae     | <i>Lophostemon confertus</i>                    | Lophostemon_confertus_600400507*      | Lophostemon_confertus_600400507*      | KM895042                             |
| Myrtales     | Myrtaceae     | <i>Lophostemon grandiflorus subsp. riparius</i> | Lophostemon_grandiflorus_300501305*   | Lophostemon_grandiflorus_300501305*   |                                      |
| Myrtales     | Myrtaceae     | <i>Lophostemon suaveolens</i>                   | Lophostemon_suaveolens_600300303*     | Lophostemon_suaveolens_600300303*     | KM895061                             |
| Myrtales     | Onagraceae    | <i>Ludwigia octovalvis</i>                      | MG934775                              | MG934844                              | JX100572                             |
| Solanales    | Solanaceae    | <i>Lycianthes shanesii</i>                      | KU564818                              | KU564588                              | KU564684                             |
| Fabales      | Fabaceae      | <i>Lysiphyllum hookeri</i>                      | Lysiphyllum_hookeri_300601453*        |                                       | Lysiphyllum_hookeri_300601453*       |
| Proteales    | Proteaceae    | <i>Macadamia integrifolia</i>                   | KM896169                              | KM894964                              | Macadamia_integrifolia_1076420391**  |
| Proteales    | Proteaceae    | <i>Macadamia ternifolia</i>                     | KM895667                              | KM894561                              |                                      |
| Proteales    | Proteaceae    | <i>Macadamia tetraphylla</i>                    | KM895504                              | KM894427                              | Macadamia_tetraphylla_129308697**    |
| Malpighiales | Euphorbiaceae | <i>Macaranga tanarius</i>                       | KM896111                              |                                       | Macaranga_tanarius_1076420411**      |
| Apiales      | Apiaceae      | <i>Mackinlaya macrosciadea</i>                  | KM895949                              | KM894787                              | Mackinlaya_macrosciadea_1076419067** |
| Rosales      | Moraceae      | <i>Maclura cochinchinensis</i>                  | HQ427219                              | KM894681                              | HQ427062                             |
| Myrtales     | Combretaceae  | <i>Macropteranthes fitzalanii</i>               | Macropteranthes_fitzalanii_300501307* | Macropteranthes_fitzalanii_300501307* |                                      |
| Cycadales    | Zamiaceae     | <i>Macrozamia miquelii</i>                      | Macrozamia_miquelii_300801605*        |                                       | Macrozamia_miquelii_300801605*       |
| Ericales     | Primulaceae   | <i>Maesa dependens</i>                          | KF496293                              | KF496293                              | Maesa_dependens_300701485*           |
| Malpighiales | Euphorbiaceae | <i>Mallotus claoxyloides</i>                    | KM895643                              | EF82639                               |                                      |

|              |                 |                                                        |                                    |                                    |                                    |
|--------------|-----------------|--------------------------------------------------------|------------------------------------|------------------------------------|------------------------------------|
| Malpighiales | Euphorbiaceae   | <i>Mallotus discolor</i>                               | KU564819                           | EF582645                           | KU564685                           |
| Malpighiales | Euphorbiaceae   | <i>Mallotus ficifolius</i> <sup>C</sup>                | KM895721                           |                                    | Mallotus_nesophilus_300501308*     |
| Malpighiales | Euphorbiaceae   | <i>Mallotus megadontus</i> <sup>C</sup>                | KM895830                           |                                    | Mallotus_nesophilus_300501308*     |
| Malpighiales | Euphorbiaceae   | <i>Mallotus mollissimus</i> <sup>C</sup>               | KM895720                           |                                    | KJ686636                           |
| Malpighiales | Euphorbiaceae   | <i>Mallotus nesophilus</i>                             | Mallotus_nesophilus_300701573*     |                                    | Mallotus_nesophilus_300501308*     |
| Malpighiales | Euphorbiaceae   | <i>Mallotus paniculatus</i>                            | Mallotus_paniculatus_300801618*    | HQ415384                           | HQ415566                           |
| Malpighiales | Euphorbiaceae   | <i>Mallotus philippensis</i>                           | KM895792                           | HQ415385                           | KJ686636                           |
| Malpighiales | Euphorbiaceae   | <i>Mallotus polyadenos</i>                             | Mallotus_polyadenos_300701574*     |                                    | Mallotus_polyadenos_BATT386-10#    |
| Malvales     | Malvaceae       | <i>Malvastrum coromandelianum</i>                      | MH050035                           | MH767933                           |                                    |
| Gentianales  | Apocynaceae     | <i>Marsdenia flavesceus</i>                            | KM895604                           |                                    | KM895075                           |
| Gentianales  | Apocynaceae     | <i>Marsdenia fraseri</i>                               | Marsdenia_fraseri_600400441*       | Marsdenia_fraseri_600400441*       | Marsdenia_fraseri_600400441*       |
| Gentianales  | Apocynaceae     | <i>Marsdenia glandulifera</i>                          | KU564821                           | KU564589                           | KU564686                           |
| Gentianales  | Apocynaceae     | <i>Marsdenia hemiptera</i>                             | KM895491                           | KM894416                           | KM895003                           |
| Gentianales  | Apocynaceae     | <i>Marsdenia lloydii</i>                               |                                    | KM894508                           | KU564687                           |
| Gentianales  | Apocynaceae     | <i>Marsdenia micradenia</i>                            | KM895681                           | KM894572                           | KM895115                           |
| Gentianales  | Apocynaceae     | <i>Marsdenia microlepis</i>                            | Marsdenia_microlepis_300601463*    | Marsdenia_microlepis_300601463*    | KU564688                           |
| Gentianales  | Apocynaceae     | <i>Marsdenia pleiadenia</i>                            | KM895951                           | KM894790                           |                                    |
| Gentianales  | Apocynaceae     | <i>Marsdenia rostrata</i>                              | KM895527                           | KU564591                           | KU564689                           |
| Gentianales  | Apocynaceae     | <i>Marsdenia viridiflora</i> subsp. <i>viridiflora</i> |                                    | KU564592                           | KU564690                           |
| Sapindales   | Rutaceae        | <i>Medicosma cunninghamii</i>                          | KM895843                           | KM894701                           |                                    |
| Sapindales   | Rutaceae        | <i>Medicosma elliptica</i>                             | KM896174                           |                                    | KM895403                           |
| Sapindales   | Rutaceae        | <i>Medicosma forsteri</i>                              | KU564825                           | KU564593                           | KU564691                           |
| Sapindales   | Rutaceae        | <i>Medicosma obovata</i>                               | Medicosma_obovata_300501310*       | Medicosma_obovata_300501310*       | Medicosma_obovata_300501310*       |
| Magnoliales  | Annonaceae      | <i>Meiogyne stenopetala</i>                            | KM895626                           | KM894528                           | KM895085                           |
| Myrtales     | Myrtaceae       | <i>Melaleuca bracteata</i>                             | KM896199                           | KM894989                           |                                    |
| Myrtales     | Myrtaceae       | <i>Melaleuca quinquenervia</i>                         | Melaleuca_quinquenervia_300201190* | Melaleuca_quinquenervia_300201190* | Melaleuca_quinquenervia_300201190* |
| Myrtales     | Myrtaceae       | <i>Melaleuca viminalis</i>                             | KF496747                           | MH621663                           | Melaleuca_viminalis_BATT639-10#    |
| Myrtales     | Myrtaceae       | <i>Melaleuca viridiflora</i>                           |                                    | AF184708                           | EU410242                           |
| Myrtales     | Melastomataceae | <i>Melastoma malabathricum</i>                         | Melastoma_malabathricum_300201181* |                                    | MH069943                           |
| Sapindales   | Meliaceae       | <i>Melia azedarach</i>                                 | KM895647                           | AY128193                           | MH621985                           |
| Ericales     | Ericaceae       | <i>Melichrus procumbens</i>                            | JQ667189                           |                                    | JQ310809                           |
| Sapindales   | Rutaceae        | <i>Melicope bonwickii</i>                              | Melicope_bonwickii_300502311*      | Melicope_bonwickii_300701575*      |                                    |



|                |                 |                                                         |                                      |                                     |                                      |
|----------------|-----------------|---------------------------------------------------------|--------------------------------------|-------------------------------------|--------------------------------------|
| Sapindales     | Rutaceae        | <i>Melicope broadbentiana</i>                           | Melicope_broadbentiana_300901674*    | Melicope_broadbentiana_300901674*   |                                      |
| Sapindales     | Rutaceae        | <i>Melicope elleryana</i>                               | JN987118                             | KM894584                            | KM895127                             |
| Sapindales     | Rutaceae        | <i>Melicope micrococca</i>                              | KM895576                             | KM894486                            |                                      |
| Sapindales     | Rutaceae        | <i>Melicope rubra</i>                                   | Melicope_rubra_300601464*            | Melicope_rubra_300601464*           | Melicope_rubra_300601464*            |
| Sapindales     | Rutaceae        | <i>Melicope vitiflora</i>                               | KM895659                             | KM894552                            |                                      |
| Sapindales     | Rutaceae        | <i>Melicope xanthoxyloides</i>                          | Melicope_xanthoxyloides_300901660*   | Melicope_xanthoxyloides_300901660*  |                                      |
| Gentianales    | Apocynaceae     | <i>Melodinus acutiflorus</i>                            | KU564826                             |                                     | KU564692                             |
| Gentianales    | Apocynaceae     | <i>Melodinus australis</i>                              | KM895840                             | KM894698                            | Melodinus_australis_1076420385**     |
| Magnoliales    | Annonaceae      | <i>Melodorum leichhardtii</i>                           | KM895567                             |                                     | KM895052                             |
| Magnoliales    | Annonaceae      | <i>Melodorum uhrii</i>                                  | Melodorum_uhrii_300601465*           |                                     | Melodorum_uhrii_300601465*           |
| Myrtales       | Melastomataceae | <i>Memecylon pauciflorum</i> <sup>C</sup>               | KU564827                             |                                     | MH069943                             |
| Fabales        | Fabaceae        | <i>Mezoneuron brachycarpum</i> <sup>C</sup>             | KM896188                             | KM894454                            |                                      |
| Fabales        | Fabaceae        | <i>Mezoneuron scortechinii</i>                          | KM895534                             | KM894454                            | KM895032                             |
| Sapindales     | Rutaceae        | <i>Micromelum minutum</i>                               | KM895535                             |                                     | KM895033                             |
| Magnoliales    | Annonaceae      | <i>Miliusa brahei</i>                                   | Miliusa_brahei_300701576*            | Miliusa_brahei_300501312*           | Miliusa_brahei_300701576*            |
| Fabales        | Fabaceae        | <i>Millettia pinnata</i>                                | Millettia_pinn_300501313*            | Millettia_pinn_300501313*           | MH622037                             |
| Ericales       | Sapotaceae      | <i>Mimusops elengi</i>                                  | KM895573                             | KM894483                            |                                      |
| Sapindales     | Sapindaceae     | <i>Mischarytera lautereriana</i>                        | KM895606                             |                                     | KM895077                             |
| Sapindales     | Sapindaceae     | <i>Mischocarpus ailae</i>                               |                                      | KM894906                            | KM895356                             |
| Sapindales     | Sapindaceae     | <i>Mischocarpus anodontus</i> <sup>C</sup>              | KM895813                             |                                     | KM895356                             |
| Sapindales     | Sapindaceae     | <i>Mischocarpus australis</i>                           | KM896114                             | KM894926                            | KM895203                             |
| Sapindales     | Sapindaceae     | <i>Mischocarpus lachnocarpus</i>                        | Mischocarpus_lachnocarpus_300601473* |                                     | Mischocarpus_lachnocarpus_300601473* |
| Sapindales     | Sapindaceae     | <i>Mischocarpus macrocarpus</i>                         | Mischocarpus_macrocarpus_300501314*  | Mischocarpus_macrocarpus_300501314* | Mischocarpus_macrocarpus_300501314*  |
| Sapindales     | Sapindaceae     | <i>Mischocarpus pyriformis</i> subsp. <i>pyriformis</i> | Mischocarpus_pyriformis_300501315*   | Mischocarpus_pyriformis_300501315*  | Mischocarpus_pyriformis_300501315*   |
| Sapindales     | Sapindaceae     | <i>Mischocarpus stipitatus</i>                          | Mischocarpus_stipitatus_300501316*   | Mischocarpus_stipitatus_300501316*  | Mischocarpus_stipitatus_300501316*   |
| Gentianales    | Loganiaceae     | <i>Mitrasacme oasena</i>                                | DQ660653                             | DQ660526                            |                                      |
| Cucurbitales   | Cucurbitaceae   | <i>Momordica charantia</i>                              | KT779314                             | KT727054                            | GQ162998                             |
| Caryophyllales | Phytolaccaceae  | <i>Monococcus echinophorus</i>                          | Monococcus_echinophorus_1076420457** |                                     | KM895203                             |
| Magnoliales    | Annonaceae      | <i>Monoon australe</i>                                  | JX227897                             | JX227872                            |                                      |
| Ericales       | Ericaceae       | <i>Monotoca scoparia</i>                                | Monotoca_scoparia_600300217*         | AF015640                            |                                      |
| Gentianales    | Rubiaceae       | <i>Morinda citrifolia</i>                               | AJ318448                             | MH768015                            | KJ426833                             |
| Fabales        | Fabaceae        | <i>Mucuna gigantea</i>                                  | KU564828                             | KU564596                            | KU564693                             |

|              |                  |                                                 |                                  |                                   |                                |
|--------------|------------------|-------------------------------------------------|----------------------------------|-----------------------------------|--------------------------------|
| Sapindales   | Rutaceae         | <i>Murraya ovatifoliolata</i>                   | KM896103                         |                                   | KM895365                       |
| Lamiales     | Scrophulariaceae | <i>Myoporum acuminatum</i>                      | KM895488                         | KM894414                          | KM895000                       |
| Magnoliales  | Myristicaceae    | <i>Myristica globosa</i> subsp. <i>Muelleri</i> | Myristica_globosa_300501319*     | Myristica_globosa_BATT206-10#     |                                |
| Ericales     | Primulaceae      | <i>Myrsine arenaria</i>                         | KU564830                         |                                   | KU564695                       |
| Ericales     | Primulaceae      | <i>Myrsine crassifolia</i>                      | KU564831                         | KU564597                          | KU564696                       |
| Ericales     | Primulaceae      | <i>Myrsine porosa</i>                           | JN564316                         | Myrsine_porosa_1076420461**       |                                |
| Ericales     | Primulaceae      | <i>Myrsine subsessilis</i>                      | KM896180                         | Myrsine_subsessilis_300701487*    | Myrsine_subsessilis_300701487* |
| Ericales     | Primulaceae      | <i>Myrsine variabilis</i>                       | KM895687                         | KM894577                          | KM895119                       |
| Gentianales  | Rubiaceae        | <i>Nauclea orientalis</i>                       | JF738530                         | KM894687                          |                                |
| Gentianales  | Apocynaceae      | <i>Neisosperma poweri</i>                       | KF496737                         | KU564598                          | KU564697                       |
| Cucurbitales | Cucurbitaceae    | <i>Neochamandra cunninghamii</i>                |                                  | KM894500                          | KM895068                       |
| Cucurbitales | Cucurbitaceae    | <i>Neosalsomitra capricornica</i>               | EF066338                         | EF066332                          |                                |
| Lurales      | Lauraceae        | <i>Neolitsea australiensis</i>                  | KM895651                         | KM894545                          |                                |
| Lurales      | Lauraceae        | <i>Neolitsea brassii</i>                        | KM896201                         |                                   | KM895422                       |
| Lurales      | Lauraceae        | <i>Neolitsea dealbata</i>                       | KM895990                         | KM894823                          |                                |
| Ericales     | Sapotaceae       | <i>Niemeyera chartacea</i>                      | KM895896                         | KM894744                          |                                |
| Ericales     | Sapotaceae       | <i>Niemeyera prunifera</i>                      | Niemeyera_prunifera_300501321*   | Niemeyera_prunifera_300501321*    |                                |
| Ericales     | Sapotaceae       | <i>Niemeyera whitei</i>                         | KM896073                         |                                   | EU661507                       |
| Lamiales     | Oleaceae         | <i>Notelaea johnsonii</i>                       |                                  | KM894438                          | KU564698                       |
| Lamiales     | Oleaceae         | <i>Notelaea longifolia</i>                      | KM895584                         | KM894494                          |                                |
| Lamiales     | Oleaceae         | <i>Notelaea microcarpa</i>                      | KM895910                         | KM894756                          |                                |
| Cucurbitales | Cucurbitaceae    | <i>Nothoalsomitra suberosa</i>                  | DQ535762                         | KU564600                          |                                |
| Fagales      | Nothofagaceae    | <i>Nothofagus moorei</i>                        | KM895644                         |                                   | JN247428                       |
| Gentianales  | Apocynaceae      | <i>Ochrosia elliptica</i>                       | Ochrosia_elliptica_300501322*    | Ochrosia_elliptica_300501322*     |                                |
| Gentianales  | Rubiaceae        | <i>Oldenlandia polyclada</i>                    | Oldenlandia_polyclada_300901636* |                                   |                                |
| Lamiales     | Oleaceae         | <i>Olea paniculata</i> <sup>c</sup>             | KM895529                         |                                   | KM895017                       |
| Asterales    | Asteraceae       | <i>Olearia canescens</i>                        | KM895998                         | KM894829                          | Olearia_canescens_1076420361** |
| Asterales    | Asteraceae       | <i>Olearia elliptica</i>                        | KM895878                         | KM894733                          | KM895235                       |
| Solanales    | Convolvulaceae   | <i>Operculina turpethum</i>                     | OY100988                         | KR025015                          |                                |
| Santalales   | Opiliaceae       | <i>Opilia amentacea</i>                         | KY381697                         | KY381660                          | KY381731                       |
| Poales       | Poaceae          | <i>Oplismenus aemulus</i>                       | HE573311                         |                                   | KU564701                       |
| Poales       | Poaceae          | <i>Oplismenus compositus</i>                    | KF496501                         | Oplismenus_compositus_BATT319-10# |                                |
| Poales       | Poaceae          | <i>Oplismenus imbecillis</i>                    | Oplismenus_imbecillis_600100061* |                                   | KU564702                       |

|              |                  |                                   |                                    |                                    |                                    |
|--------------|------------------|-----------------------------------|------------------------------------|------------------------------------|------------------------------------|
| Proteales    | Proteaceae       | <i>Orites excelsus</i>            | KM895794                           | KM894663                           | Orites_excelsus_129308484**        |
| Poales       | Poaceae          | <i>Ottochloa gracillima</i>       | HE573328                           | HE574441                           |                                    |
| Poales       | Poaceae          | <i>Ottochloa nodosa</i>           | KF496551                           | Ottochloa_nodosa_BATT123-10#       | Ottochloa_nodosa_BATT123-10#       |
| Sapindales   | Meliaceae        | <i>Owenia acidula</i>             | KM896185                           | KM894980                           |                                    |
| Sapindales   | Meliaceae        | <i>Owenia cepiodora</i>           |                                    | KU564602                           | KU564704                           |
| Sapindales   | Meliaceae        | <i>Owenia venosa</i>              | KM896047                           | KM894658                           |                                    |
| Asterales    | Asteraceae       | <i>Ozothamnus bidwillii</i>       | KM895559                           | KM894469                           | KM895049                           |
| Asterales    | Asteraceae       | <i>Ozothamnus cassinioides</i>    | Ozothamnus_cassinioides_300801601* | Ozothamnus_cassinioides_300801601* | Ozothamnus_cassinioides_300801601* |
| Asterales    | Asteraceae       | <i>Ozothamnus rufescens</i>       | KM895902                           | KM894749                           |                                    |
| Ranunculales | Menispermaceae   | <i>Pachygone ovata</i>            | Pachygone_ovata_300501324*         | Pachygone_ovata_300501324*         |                                    |
| Laurales     | Monimiaceae      | <i>Palmeria hypotephra</i>        | Palmeria_hypotephra_300701489*     | Palmeria_hypotephra_300701489*     | Palmeria_hypotephra_300701489*     |
| Laurales     | Monimiaceae      | <i>Palmeria scandens</i>          | Palmeria_scandens_300501325*       | Palmeria_scandens_300501325*       |                                    |
| Lamiales     | Bignoniaceae     | <i>Pandorea baileyana</i>         | KM895975                           | KM894810                           | KM895284                           |
| Lamiales     | Bignoniaceae     | <i>Pandorea floribunda</i>        | KM895724                           | KM894612                           |                                    |
| Lamiales     | Bignoniaceae     | <i>Pandorea jasminoides</i>       | KM895983                           | KM894818                           |                                    |
| Lamiales     | Bignoniaceae     | <i>Pandorea pandorana</i>         | Pandorea_pandorana_300501326*      | Pandorea_pandorana_BATT634-10#     | Pandorea_pandorana_300501326*      |
| Poales       | Poaceae          | <i>Panicum effusum</i>            | Panicum_effusum_600400602*         |                                    | Panicum_effusum_600400602*         |
| Poales       | Poaceae          | <i>Panicum pygmaeum</i>           | KU564842                           |                                    | KU564706                           |
| Poales       | Poaceae          | <i>Panicum simile</i>             | Panicum_simile_600400500*          | Panicum_simile_600400500*          | Panicum_simile_600400500*          |
| Poales       | Poaceae          | <i>Panicum trichoides</i>         | JQ593386                           | JQ588771                           |                                    |
| Fabales      | Fabaceae         | <i>Pararchidendron pruinsum</i>   | KM896057                           | KM894880                           |                                    |
| Piperales    | Aristolochiaceae | <i>Pararistolochia deltantha</i>  | JQ667459                           | JQ667194                           |                                    |
| Piperales    | Aristolochiaceae | <i>Pararistolochia laheyana</i>   | KM895514                           | KM894639                           | KM895168                           |
| Piperales    | Aristolochiaceae | <i>Pararistolochia praevenosa</i> | JQ667462                           | KM894852                           |                                    |
| Gentianales  | Apocynaceae      | <i>Parsonsia eucalyptophylla</i>  | KM895933                           | KM894774                           |                                    |
| Gentianales  | Apocynaceae      | <i>Parsonsia fulva</i>            | KM895562                           | KM894473                           | Parsonsia_fulva_1076420562**       |
| Gentianales  | Apocynaceae      | <i>Parsonsia lanceolata</i>       | KM896006                           | KM894834                           | KM895307                           |
| Gentianales  | Apocynaceae      | <i>Parsonsia larcomensis</i>      | Parsonsia_larcomensis_300801600*   | Parsonsia_larcomensis_300801600*   |                                    |
| Gentianales  | Apocynaceae      | <i>Parsonsia latifolia</i>        | Parsonsia_latifolia_300701490*     | Parsonsia_latifolia_300701490*     |                                    |
| Gentianales  | Apocynaceae      | <i>Parsonsia leichhardtii</i>     | KM896018                           | KM894847                           |                                    |
| Gentianales  | Apocynaceae      | <i>Parsonsia lilacina</i>         |                                    | KM894615                           | KM895148                           |
| Gentianales  | Apocynaceae      | <i>Parsonsia longipetiolata</i>   |                                    | KM894553                           | KM895103                           |
| Gentianales  | Apocynaceae      | <i>Parsonsia paulforsteri</i>     | KM895759                           | KM894639                           | KM895168                           |

|              |                 |                                                     |                                      |                                |                                  |
|--------------|-----------------|-----------------------------------------------------|--------------------------------------|--------------------------------|----------------------------------|
| Gentianales  | Apocynaceae     | <i>Parsonsia plaesiophylla</i>                      | KM895578                             | KM894488                       |                                  |
| Gentianales  | Apocynaceae     | <i>Parsonsia rotata</i>                             | KM896043                             | KM894870                       | KM895330                         |
| Gentianales  | Apocynaceae     | <i>Parsonsia straminea</i>                          | Parsonsia_straminea_300201191*       | KM894808                       | Parsonsia_straminea_300201191*   |
| Gentianales  | Apocynaceae     | <i>Parsonsia tenuis</i>                             | KM895709                             | KM894600                       | KM895135                         |
| Gentianales  | Apocynaceae     | <i>Parsonsia velutina</i>                           | KM895809                             | KM894675                       |                                  |
| Gentianales  | Apocynaceae     | <i>Parsonsia ventricosa</i>                         | KM895728                             | KM894616                       | KM895150                         |
| Malpighiales | Passifloraceae  | <i>Passiflora aurantia</i>                          | KM895824                             |                                | KM895202                         |
| Malpighiales | Passifloraceae  | <i>Passiflora foetida</i>                           | Passiflora_foetida_300701491*        | Passiflora_foetida_300701491*  | Passiflora_foetida_300701491*    |
| Malpighiales | Passifloraceae  | <i>Passiflora herbertiana</i>                       | KM895950                             | KM894789                       |                                  |
| Gentianales  | Rubiaceae       | <i>Pavetta australiensis</i>                        | KM896165                             |                                | KM895399                         |
| Gentianales  | Rubiaceae       | <i>Pavetta brownii</i>                              | Pavetta_brownii_300701492*           | Pavetta_brownii_300701492*     |                                  |
| Apiales      | Pennantiaceae   | <i>Pennantia cunninghamii</i>                       | KM895982                             | KM894816                       | KM895293                         |
| Sapindales   | Rutaceae        | <i>Pentaceras australe</i>                          | KM895918                             | KM894764                       |                                  |
| Piperales    | Piperaceae      | <i>Peperomia blanda</i>                             | KM895679                             | DQ212763                       |                                  |
| Piperales    | Piperaceae      | <i>Peperomia tetraphylla</i>                        | Peperomia_tetraphylla_300501327*     |                                | Peperomia_tetraphylla_300501327* |
| Piperales    | Piperaceae      | <i>Pepperomia enervis</i>                           | Pepperomia_enervis_BATT237-10#       | Pepperomia_enervis_BATT237-10# |                                  |
| Poales       | Poaceae         | <i>Perotis rara</i>                                 | EF125098                             | AF144590                       |                                  |
| Proteales    | Proteaceae      | <i>Persoonia amaliae</i>                            | KM895661                             | KM894555                       |                                  |
| Proteales    | Proteaceae      | <i>Persoonia media</i>                              |                                      | KM894502                       | KM895070                         |
| Malpighiales | Picrodendraceae | <i>Petalostigma triloculare</i>                     | KM896051                             | KM894874                       | KM895336                         |
| Liliales     | Petermanniaceae | <i>Petermannia cirrosa</i>                          | KM895668                             | JQ435572                       |                                  |
| Asparagales  | Orchidaceae     | <i>Phaius tankervilleae</i> var. <i>australis</i> * | Phaius_australis_300701483*          | Phaius_australis_300701483*    |                                  |
| Malvales     | Thymelaeaceae   | <i>Phaleria chermsideana</i>                        | KM895917                             |                                | KM895257                         |
| Malvales     | Thymelaeaceae   | <i>Phaleria octandra</i>                            | Phaleria_octandra_300501328*         | Phaleria_octandra_300501328*   | Phaleria_octandra_300501328*     |
| Sapindales   | Rutaceae        | <i>Phebalium distans</i>                            | KM896144                             |                                | KM895388                         |
| Sapindales   | Rutaceae        | <i>Phebalium woombye</i>                            | Phebalium_woombye_300201161*         |                                | Phebalium_woombye_300201161*     |
| Malpighiales | Phyllanthaceae  | <i>Phyllanthus apodogynus</i> *                     | Glochidion_apodogynum_300401277*     |                                | Glochidion_apodogynum_300401277* |
| Malpighiales | Phyllanthaceae  | <i>Phyllanthus gunnii</i>                           | KM895543                             | KM894461                       | KM895038                         |
| Malpighiales | Phyllanthaceae  | <i>Phyllanthus lamprophyllus</i>                    | Phyllanthus_lamprophyllus_300801584* |                                |                                  |
| Malpighiales | Phyllanthaceae  | <i>Phyllanthus microcladus</i>                      | KM896161                             | KM894957                       |                                  |
| Malpighiales | Phyllanthaceae  | <i>Phyllanthus novae-hollandiae</i>                 | Phyllanthus_novae_300701493*         | Phyllanthus_novae_300701493*   | Phyllanthus_novae_300701493*     |
| Malpighiales | Phyllanthaceae  | <i>Phyllanthus sauropodoides</i>                    | KM895914                             | KM894759                       |                                  |

|                |                |                                                         |                                        |                                        |                                      |
|----------------|----------------|---------------------------------------------------------|----------------------------------------|----------------------------------------|--------------------------------------|
| Malpighiales   | Phyllanthaceae | <i>Phyllanthus</i> sp. (Bulburin P.I.Forster+ PIF16034) | KM896130                               | KM894937                               | Phyllanthus_sp_Bulburin_1076420357** |
| Malpighiales   | Phyllanthaceae | <i>Phyllanthus subcrenulatus</i>                        | KM895972                               | KM894807                               |                                      |
| Malpighiales   | Phyllanthaceae | <i>Phyllanthus virgatu</i>                              | MH767556                               | MH767860                               |                                      |
| Myrtales       | Myrtaceae      | <i>Pilidostigma glabrum</i>                             | KM896004                               | KM894832                               |                                      |
| Myrtales       | Myrtaceae      | <i>Pilidostigma tropicum</i>                            | Pilidostigma_tropicum_300701494*       | Pilidostigma_tropicum_300701494*       |                                      |
| Malvales       | Thymelaeaceae  | <i>Pimelea latifolia</i>                                | KM895880                               | KM894735                               | Pimelea_latifolia_1076419108**       |
| Piperales      | Piperaceae     | <i>Piper caninum</i>                                    | MG968279                               | MG968363                               | KM055179                             |
| Piperales      | Piperaceae     | <i>Piper hederaceum</i>                                 | KM895489                               |                                        | KM895001                             |
| Piperales      | Piperaceae     | <i>Piper interruptum</i>                                | Piper_interruptum_300501330*           |                                        | Piper_interruptum_300501330*         |
| Piperales      | Piperaceae     | <i>Piper umbellatum</i>                                 | Piper_umbellatum_300701495*            |                                        | Piper_umbellatum_300701495*          |
| Rosales        | Urticaceae     | <i>Pipturus argenteus</i>                               |                                        | KU564603                               | KU564710                             |
| Caryophyllales | Nyctaginaceae  | <i>Pisonia aculeata</i>                                 |                                        | KU564604                               |                                      |
| Caryophyllales | Nyctaginaceae  | <i>Pisonia grandis</i>                                  | MH767673                               | MH767973                               |                                      |
| Caryophyllales | Nyctaginaceae  | <i>Pisonia umbellifera</i>                              | Pisonia_umbellifera_300701496*         | Pisonia_umbellifera_300701496*         |                                      |
| Sapindales     | Rutaceae       | <i>Pitaviaster haplophyllus</i>                         | KU564848                               |                                        | KU564712                             |
| Apiales        | Pittosporaceae | <i>Pittosporum angustifolium</i>                        | KM895508                               | KM894430                               |                                      |
| Apiales        | Pittosporaceae | <i>Pittosporum ferrugineum</i>                          | KM895654                               | KM894548                               |                                      |
| Apiales        | Pittosporaceae | <i>Pittosporum lancifolium</i>                          | KM895670                               | KM894564                               |                                      |
| Apiales        | Pittosporaceae | <i>Pittosporum multiflorum</i>                          | KM896108                               |                                        | KM895370                             |
| Apiales        | Pittosporaceae | <i>Pittosporum revolutum</i>                            |                                        | KM894960                               | Pittosporum_revolutum_1076418231**   |
| Apiales        | Pittosporaceae | <i>Pittosporum spinescens</i>                           | KM895829                               | KM894692                               | KM895206                             |
| Apiales        | Pittosporaceae | <i>Pittosporum undulatum</i>                            | KM895533                               | KM894453                               | Pittosporum_undulatum_1076419105**   |
| Apiales        | Pittosporaceae | <i>Pittosporum venulosum</i>                            | Pittosporum_venulosum_300701497*       | Pittosporum_venulosum_300701497*       | Pittosporum_venulosum_300701497*     |
| Apiales        | Pittosporaceae | <i>Pittosporum viscidum</i>                             | KM895614                               | KM894518                               |                                      |
| Ericales       | Sapotaceae     | <i>Planchonella chartacea</i>                           | KM896068                               | KM894891                               |                                      |
| Ericales       | Sapotaceae     | <i>Planchonella eerwah</i>                              | KM895956                               | KM894796                               |                                      |
| Ericales       | Sapotaceae     | <i>Planchonella euphlebia</i>                           | JN564321                               | JN564321                               |                                      |
| Ericales       | Sapotaceae     | <i>Planchonella myrsinifolia</i>                        | KM896072                               | KM894894                               |                                      |
| Ericales       | Sapotaceae     | <i>Planchonella myrsinodendron</i>                      | Planchonella_myrsinodendron_300501333* | Planchonella_myrsinodendron_300501333* |                                      |
| Ericales       | Sapotaceae     | <i>Planchonella myrsinoides*</i>                        | Planchonella_cotinifolia_300501332*    | Planchonella_cotinifolia_300501332*    |                                      |
| Ericales       | Sapotaceae     | <i>Planchonella pohlmaniana</i>                         | Planchonella_pohlmaniana_300701498*    | Planchonella_pohlmaniana_300701498*    |                                      |
| Ericales       | Lecythidaceae  | <i>Planchonia careya</i>                                | Planchonia_careya_300501331*           | Planchonia_careya_300501331*           | KM894763                             |

|                |                |                                 |                                     |                                    |                                      |
|----------------|----------------|---------------------------------|-------------------------------------|------------------------------------|--------------------------------------|
| Lamiales       | Lamiaceae      | <i>Plectranthus graveolens</i>  | Plectranthus_graveolens_300801599*  |                                    | Plectranthus_graveolens_300801599*   |
| Lamiales       | Lamiaceae      | <i>Plectranthus parviflorus</i> | Plectranthus_parviflorus_300801606* |                                    | Plectranthus_parviflorus_300801606*  |
| Sapindales     | Anacardiaceae  | <i>Pleiogynium timorense</i>    | KM896152                            | KM894951                           | KM895348                             |
| Ericales       | Sapotaceae     | <i>Pleioluma queenslandica</i>  | KM895802                            | KM894671                           | KM895371                             |
| Ranunculales   | Menispermaceae | <i>Pleogyne australis</i>       | KM896206                            | KM894994                           |                                      |
| Celastrales    | Celastraceae   | <i>Pleurostylia opposita</i>    | KM89549                             | KM894417                           | KM895004                             |
| Caryophyllales | Plumbaginaceae | <i>Plumbago zeylanica</i>       | Plumbago_zeylanica_300801603*       | Plumbago_zeylanica_300801603*      |                                      |
| Cupressales    | Podocarpaceae  | <i>Podocarpus elatus</i>        | KM896187                            | KF13689                            |                                      |
| Cupressales    | Podocarpaceae  | <i>Podocarpus grayae</i>        | Podocarpus_grayae_300701499*        |                                    | Podocarpus_grayae_300701499*         |
| Commelinales   | Commelinaceae  | <i>Pollia crispata</i>          | KM895594                            |                                    |                                      |
| Commelinales   | Commelinaceae  | <i>Pollia macrophylla</i>       | KM895510                            |                                    |                                      |
| Magnoliales    | Annonaceae     | <i>Polyalthia nitidissima</i>   | KM895624                            | KM894526                           | Polyalthia_nitidissima_1076418218**  |
| Escalloniales  | Escalloniaceae | <i>Polyosma alangiacea</i>      | Polyosma_alangiacea_300701500*      | Polyosma_alangiacea_300701500*     | Polyosma_alangiacea_300701500*       |
| Escalloniales  | Escalloniaceae | <i>Polyosma cunninghamii</i>    | KM895861                            | AJ429368                           |                                      |
| Escalloniales  | Escalloniaceae | <i>Polyosma rhytophloia</i>     | Polyosma_rhytophloia_300501336*     | Polyosma_rhytophloia_300501336*    |                                      |
| Apiales        | Araliaceae     | <i>Polyscias australiana</i>    | KU564850                            |                                    | KU564714                             |
| Apiales        | Araliaceae     | <i>Polyscias elegans</i>        | KM895657                            | KM894550                           |                                      |
| Apiales        | Araliaceae     | <i>Polyscias murrayi</i>        | KM896010                            | KM894838                           |                                      |
| Apiales        | Araliaceae     | <i>Polyscias nodosa</i>         | Polyscias_nodosa_300501337*         |                                    | Polyscias_nodosa_300501337*          |
| Apiales        | Araliaceae     | <i>Polyscias sambucifolia</i>   | KM896053                            | KM894876                           |                                      |
| Rosales        | Rhamnaceae     | <i>Pomaderris argyrophylla</i>  | Pomaderris_argyrophylla_600300404*  | Pomaderris_argyrophylla_600300404* | Pomaderris_argyrophylla_600300404*   |
| Rosales        | Rhamnaceae     | <i>Pomaderris clivicola</i>     | KU564851                            | KU564605                           | KU564715                             |
| Rosales        | Rhamnaceae     | <i>Pomaderris tropica</i>       | Pomaderris_tropica_300701501*       | Pomaderris_tropica_300701501*      | Pomaderris_tropica_300701501*        |
| Malpighiales   | Phyllanthaceae | <i>Poranthera microphylla</i>   | AY663612                            | AM745887                           |                                      |
| Alismatales    | Araceae        | <i>Pothos longipes</i>          | KM895540                            | KM894458                           | KM895037                             |
| Alismatales    | Araceae        | <i>Pothos longipes</i> *        | Pothos_brownii_300501338*           | Pothos_brownii_300501338*          | Pothos_brownii_300501338*            |
| Lamiales       | Lamiaceae      | <i>Premna odorata</i>           | MH549957                            | MH621575                           | MH622038                             |
| Lamiales       | Lamiaceae      | <i>Premna serratifolia</i>      | Premna_serratifolia_300801587*      | Premna_serratifolia_BATT218-10#    | Premna_serratifolia_300801587*       |
| Lamiales       | Lamiaceae      | <i>Premna serratifolia</i> *    | Premna_dallachyana_300501339*       |                                    | Premna_dallachyana_300501339*        |
| Asparagales    | Amaryllidaceae | <i>Proiphys amboinensis</i>     | Proiphys_amboinensis_300501340*     | Proiphys_amboinensis_300501340*    | Proiphys_amboinensis_300501340*      |
| Asparagales    | Amaryllidaceae | <i>Proiphys cunninghamii</i>    | AF116978                            |                                    | KU564717                             |
| Lamiales       | Lamiaceae      | <i>Prostanthera ovalifolia</i>  |                                     | KU564606                           | KU564718                             |
| Lamiales       | Acanthaceae    | <i>Pseuderanthemum tenellum</i> | KM895730                            |                                    | Pseuderanthemum_tenellum_129307943** |

|                |                 |                                                              |                                    |                                     |                                           |
|----------------|-----------------|--------------------------------------------------------------|------------------------------------|-------------------------------------|-------------------------------------------|
| Lamiales       | Acanthaceae     | <i>Pseuderanthemum variabile</i>                             | KF496479                           |                                     | KU564719                                  |
| Asparagales    | Orchidaceae     | <i>Pseudovanilla foliata</i>                                 | Pseudovanilla_foliata_300501341*   | Pseudovanilla_foliata_300501341*    |                                           |
| Oxalidales     | Cunoniaceae     | <i>Pseudoweinmannia lachnocarpa</i>                          | KM896192                           |                                     | Pseudoweinmannia_lachnocarpa_1076419057** |
| Myrtales       | Myrtaceae       | <i>Psidium guajava</i>                                       | MH069805                           | MB354958                            | MH069990                                  |
| Gentianales    | Rubiaceae       | <i>Psychotria dallachiana</i>                                | Psychotria_dallachiana_300701503*  |                                     | KF676282                                  |
| Gentianales    | Rubiaceae       | <i>Psychotria daphnoides</i>                                 | KM895682                           |                                     | KF676284                                  |
| Gentianales    | Rubiaceae       | <i>Psychotria fitzalanii</i>                                 |                                    |                                     | Psychotria_fitzalanii**                   |
| Gentianales    | Rubiaceae       | <i>Psychotria loniceroides</i>                               | Psychotria_loniceroides_600200244* | KM894504                            | Psychotria_loniceroides_600200244*        |
| Gentianales    | Rubiaceae       | <i>Psychotria polioSTEMMA</i>                                | Psychotria_polioSTEMMA_300502342*  |                                     | KF676313                                  |
| Gentianales    | Rubiaceae       | <i>Psychotria simmondsiana</i>                               | KM896118                           |                                     | KM895376                                  |
| Gentianales    | Rubiaceae       | <i>Psydrax lamprophylla</i>                                  | Psydrax_lamprophylla_300501343*    | Psydrax_lamprophylla_300501343*     |                                           |
| Gentianales    | Rubiaceae       | <i>Psydrax laxiflorens</i>                                   | Psydrax_laxiflorens_300701504*     | Psydrax_laxiflorens_BATT745-10#     |                                           |
| Gentianales    | Rubiaceae       | <i>Psydrax odorata</i>                                       | KM896060                           | KM894471                            | Psydrax_odorata_1076420403**              |
| Gentianales    | Rubiaceae       | <i>Psydrax odorata forma (Bridgooda P.I.Forster PIF5657)</i> | KU564857                           | KU64608                             | Psydrax_odorata_forma_300201122*          |
| Arecales       | Arecaceae       | <i>Ptychosperma elegans</i>                                  | Ptychosperma_elegans_300501344*    | Ptychosperma_elegans_300501344*     | Ptychosperma_elegans_BATT547-10#          |
| Arecales       | Arecaceae       | <i>Ptychosperma macarthurii</i>                              | AM110235                           | AM114693                            |                                           |
| Paracryphiales | Paracryphiaceae | <i>Quintinia quatrefagesii</i>                               | KF496721                           | Quintinia_quatrefagesii_BATT273-10# | Quintinia_quatrefagesii CERF171-10#       |
| Paracryphiales | Paracryphiaceae | <i>Quintinia sieberi</i>                                     | KM895837                           |                                     | KM895210                                  |
| Paracryphiales | Paracryphiaceae | <i>Quintinia verdonii</i>                                    | KM896202                           | KM894990                            |                                           |
| Gentianales    | Rubiaceae       | <i>Randia moorei</i>                                         |                                    | KU564609                            | KU564721                                  |
| Gentianales    | Rubiaceae       | <i>Randia sp.</i>                                            | Randia_sp_spiny_300901656*         | Randia_sp_spiny_300901656*          |                                           |
| Rhamnales      | Rhamnaceae      | <i>Rhamnella vitiensis</i>                                   | KF496656                           | KM894562                            |                                           |
| Myrtales       | Myrtaceae       | <i>Rhodamnia acuminata</i>                                   | KM895787                           | KM894659                            |                                           |
| Myrtales       | Myrtaceae       | <i>Rhodamnia angustifolia</i>                                | KU564860                           | KM894678                            | KM895199                                  |
| Myrtales       | Myrtaceae       | <i>Rhodamnia argentea</i>                                    |                                    | KM894835                            | KM895308                                  |
| Myrtales       | Myrtaceae       | <i>Rhodamnia costata</i>                                     | Rhodamnia_costata_BATT510-10#      | Rhodamnia_costata_BATT510-10#       | Rhodamnia_costata_BATT510-10#             |
| Myrtales       | Myrtaceae       | <i>Rhodamnia dumicola</i>                                    | KM895550                           | KM894465                            | Rhodamnia_dumicola_300201125*             |
| Myrtales       | Myrtaceae       | <i>Rhodamnia glabrescens</i>                                 | KM896156                           | KM894954                            |                                           |
| Myrtales       | Myrtaceae       | <i>Rhodamnia maideniana</i>                                  | KM895978                           | KM894813                            |                                           |
| Myrtales       | Myrtaceae       | <i>Rhodamnia pauciovulata</i>                                |                                    | KM894974                            | KM895408                                  |
| Myrtales       | Myrtaceae       | <i>Rhodamnia rubescens</i>                                   | KM895842                           | KM894700                            | KM895213                                  |
| Myrtales       | Myrtaceae       | <i>Rhodamnia spongiosa</i>                                   |                                    |                                     | KU564724                                  |

|                |                |                                                                |                                      |                                      |                                     |
|----------------|----------------|----------------------------------------------------------------|--------------------------------------|--------------------------------------|-------------------------------------|
| Myrtales       | Myrtaceae      | <i>Rhodamnia whiteana</i>                                      | KM895801                             | KM894670                             |                                     |
| Myrtales       | Myrtaceae      | <i>Rhodomyrtus psidioides</i>                                  | KM895791                             |                                      | KM895187                            |
| Myrtales       | Myrtaceae      | <i>Rhodomyrtus sericea</i>                                     | Rhodomyrtus_sericea_300501347*       | Rhodomyrtus_sericea_300701506*       | Rhodomyrtus_sericea_300701506*      |
| Myrtales       | Myrtaceae      | <i>Rhodomyrtus trineura subsp. trineura</i>                    | Rhodomyrtus_trineura_300501348*      | Rhodomyrtus_trineura_300501348*      |                                     |
| Sapindales     | Anacardiaceae  | <i>Rhodosphaera rhodanthema</i>                                | KM895909                             | KM894755                             |                                     |
| Fabales        | Fabaceae       | <i>Rhynchosia acuminatissima</i>                               |                                      | KU564611                             | KU564725                            |
| Poales         | Cyperaceae     | <i>Rhynchospora sp.</i>                                        | Rhynchospora_rubra_600400502*        | JQ589540                             |                                     |
| Sapindales     | Sapindaceae    | <i>Rhysotoechia bifoliolata</i>                                |                                      | KM894911                             | KM895363                            |
| Malpighiales   | Euphorbiaceae  | <i>Ricinocarpos ledifolius</i>                                 | KM895566                             |                                      | Ricinocarpos_ledifolius_129308542** |
| Malpighiales   | Euphorbiaceae  | <i>Ripogonum album</i>                                         | Ricinocarpos_pinifolius_600300350*   | AB268053                             |                                     |
| Liliales       | Rhipogonaceae  | <i>Ripogonum album</i> *                                       | Ripogonum_danesii_300701507*         | Ripogonum_danesii_300701507*         | Ripogonum_danesii_300701507*        |
| Liliales       | Rhipogonaceae  | <i>Ripogonum brevifolium</i>                                   | KU564863                             | KM894864                             | KU564726                            |
| Liliales       | Rhipogonaceae  | <i>Ripogonum discolor</i>                                      | KM895572                             | KM894482                             |                                     |
| Liliales       | Rhipogonaceae  | <i>Ripogonum fawcettianum</i>                                  |                                      | KM894883                             | KM895341                            |
| Myrtales       | Myrtaceae      | <i>Ristantia gouldii</i>                                       | KF496365                             | AF368219                             |                                     |
| Caryophyllales | Phytolaccaceae | <i>Rivina humilis</i>                                          | JQ593145                             | JQ588609                             |                                     |
| Malpighiales   | Euphorbiaceae  | <i>Rockinghamia angustifolia</i>                               | Rockinghamia_angustifolia_300501350* | Rockinghamia_angustifolia_300501350* |                                     |
| Asparagales    | Asparagaceae   | <i>Romnaldia strobilacea</i>                                   | KM896166                             | KM894961                             | KM895400                            |
| Oxalidales     | Connaraceae    | <i>Rourea minor</i>                                            | JF738847                             | AB924776                             | KP095765                            |
| Rosales        | Rosaceae       | <i>Rubus moluccanus var. moluccanus</i>                        | KM895599                             | KM894509                             | Rubus_moluccanus_129308470**        |
| Rosales        | Rosaceae       | <i>Rubus moorei</i> <sup>C</sup>                               | KM896001                             | KM894509                             |                                     |
| Rosales        | Rosaceae       | <i>Rubus nebulosus</i>                                         | KM896080                             | KM894898                             |                                     |
| Rosales        | Rosaceae       | <i>Rubus probus</i>                                            | KX678976                             | KX677532                             |                                     |
| Rosales        | Rosaceae       | <i>Rubus rosifolius</i>                                        | KM895838                             |                                      | KM895211                            |
| Lamiales       | Acanthaceae    | <i>Ruellia simplex</i>                                         | MF349704                             | MF350155                             | KT161353                            |
| Asterales      | Asteraceae     | <i>Sageretia hamosa</i>                                        | Rutidosia_murchisonii_600200224*     |                                      | Rutidosia_murchisonii_600200224*    |
| Sapindales     | Simaroubaceae  | <i>Samadera sp. (Dam Creek T.S.Ryan 1006)</i>                  | Samadera_DamCreek_300701508*         |                                      | Samadera_DamCreek_300701508*        |
| Sapindales     | Simaroubaceae  | <i>Samadera sp. (Mt Nardi B.L.Walker AQ330746)<sup>C</sup></i> | KM896157                             | EU042881                             |                                     |
| Fabales        | Fabaceae       | <i>Samanea saman</i>                                           | MN592266                             | MN579909                             | AF524984                            |
| Dipsacales     | Adoxaceae      | <i>Sambucus australasica</i>                                   | KM895620                             |                                      | KM895081                            |
| Dipsacales     | Adoxaceae      | <i>Sambucus gaudichaudiana</i>                                 | Sambucus_gaudichaudiana_300201132*   | Sambucus_gaudichaudiana_300201132*   | Sambucus_gaudichaudiana_300201132*  |
| Santalales     | Rutaceae       | <i>Santalum lanceolatum</i>                                    | KM895777                             | KM894652                             |                                     |



|              |                |                                                   |                                      |                                      |                                      |
|--------------|----------------|---------------------------------------------------|--------------------------------------|--------------------------------------|--------------------------------------|
| Sapindales   | Rutaceae       | <i>Sarcomelicope simplicifolia</i>                | KM894966                             | KM896170                             |                                      |
| Ranunculales | Menispermaceae | <i>Sarcopetalum harveyanum</i>                    | KM895669                             | KM894563                             |                                      |
| Sapindales   | Sapindaceae    | <i>Sarcopteryx lasioneura</i>                     | Sarcopteryx_lasioneura_300402287*    | Sarcopteryx_lasioneura_300402287*    |                                      |
| Sapindales   | Sapindaceae    | <i>Sarcopteryx martyana</i>                       |                                      | AY724326                             |                                      |
| Sapindales   | Sapindaceae    | <i>Sarcopteryx stipata</i>                        | KM895731                             |                                      | KM895152                             |
| Sapindales   | Sapindaceae    | <i>Sarcotoechia heterophylla</i>                  | Sarcotoechia_heterophylla_300501353* | Sarcotoechia_heterophylla_300501353* |                                      |
| Asterales    | Goodeniaceae   | <i>Scaevola enantophylla</i>                      | Scaevola_enantophylla_300501354*     |                                      | Scaevola_enantophylla_300501354*     |
| Asterales    | Goodeniaceae   | <i>Scaevola taccada</i>                           | Scaevola_taccada_300701509*          | Scaevola_taccada_300701509*          | Scaevola_taccada_300701509*          |
| Apiales      | Araliaceae     | <i>Schefflera actinophylla</i>                    | Schefflera_actinophylla_1076420430** | KM894791                             | Schefflera_actinophylla_1076420430** |
| Oxalidales   | Cunoniaceae    | <i>Schizomeria ovata</i>                          | Schizomeria_ovata_300701510*         | Schizomeria_ovata_300701510*         | Schizomeria_ovata_300701510*         |
| Poales       | Cyperaceae     | <i>Scleria sp.</i>                                | GQ130365                             | FR832833                             |                                      |
| Poales       | Cyperaceae     | <i>Scleria sphacelata</i> <sup>C</sup>            | Scleria_sphacelata_600100076*        | JQ587380                             |                                      |
| Malpighiales | Salicaceae     | <i>Scolopia braunii</i>                           | KM895904                             |                                      | KM895251                             |
| Gentianales  | Apocynaceae    | <i>Secamone elliptica</i>                         | KM895810                             | KM894676                             | KM895197                             |
| Asterales    | Asteraceae     | <i>Senecio amygdalifolius</i>                     | KM895906                             | KM894753                             |                                      |
| Fabales      | Fabaceae       | <i>Senna acclinis</i> Randell                     | KM896054                             | KM894877                             |                                      |
| Fabales      | Fabaceae       | <i>Senna coronilloides</i> Randell                | KM895876                             | KM894731                             |                                      |
| Fabales      | Fabaceae       | <i>Senna gaudichaudii</i>                         | KM895887                             | KM894739                             | Senna_gaudichaudii_300201134*        |
| Fabales      | Fabaceae       | <i>Senna sophera</i>                              | KM895619                             |                                      | KM895080                             |
| Fabales      | Fabaceae       | <i>Senna sulfurea</i>                             | JQ301853                             | JQ301873                             | HQ161758                             |
| Fabales      | Fabaceae       | <i>Senna surattensis</i>                          | Senna_surattensis_300501355*         | Senna_surattensis_300501355*         | Senna_surattensis_300501355*         |
| Ericales     | Sapotaceae     | <i>Sersalisia sericea</i>                         | Sersalisia_sericea_300501356*        |                                      | Sersalisia_sericea_1076420285**      |
| Poales       | Poaceae        | <i>Setaria oplismenoides</i>                      | Setaria_oplismenoides_300501357*     |                                      | Setaria_oplismenoides_300501357*     |
| Poales       | Poaceae        | <i>Setaria pumila</i>                             | MK526658                             |                                      | MK260907                             |
| Cucurbitales | Cucurbitaceae  | <i>Sicyos australis</i>                           | KM896138                             | Sicyos_australis_300201135*          | KM895384                             |
| Malvales     | Malvaceae      | <i>Sida cordifolia</i>                            | MH767640                             | MH767941                             | KJ637017                             |
| Malvales     | Malvaceae      | <i>Sida rhombifolia</i>                           | MH549993                             | MH551756                             | MH622089                             |
| Asterales    | Asteraceae     | <i>Sigesbeckia orientalis</i>                     | GQ436447                             | HM989746                             | GQ435085                             |
| Celastrales  | Celastraceae   | <i>Siphonodon australis</i>                       |                                      | KM894704                             | KM895214                             |
| Oxalidales   | Elaeocarpaceae | <i>Sloanea australis</i> subsp. <i>parviflora</i> | Sloanea_australis_300701511*         | KM894713                             | Sloanea_australis_300701511*         |
| Oxalidales   | Elaeocarpaceae | <i>Sloanea langii</i>                             | Sloanea_langii_300701512*            | Sloanea_langii_300701512*            | Sloanea_langii_300701512*            |
| Oxalidales   | Elaeocarpaceae | <i>Sloanea macbrydei</i>                          | KU564865                             |                                      | KU564730                             |
| Oxalidales   | Elaeocarpaceae | <i>Sloanea woollsii</i>                           | KM895994                             | KM894828                             | KM895300                             |

|                |                 |                                          |                                      |                                      |                                      |
|----------------|-----------------|------------------------------------------|--------------------------------------|--------------------------------------|--------------------------------------|
| Liliales       | Smilacaceae     | <i>Smilax australis</i>                  | KM896017                             | KM894846                             |                                      |
| Liliales       | Smilacaceae     | <i>Smilax calophylla</i>                 | Smilax_calophylla_300502358*         | Smilax_calophylla_300502358*         | Smilax_calophylla_300502358*         |
| Liliales       | Smilacaceae     | <i>Smilax glyciphylla</i>                | KM895858                             | KM894718                             |                                      |
| Liliales       | Smilacaceae     | <i>Smilax sp.</i>                        | Smilax_sp_300901627*                 | Smilax_sp_300901627*                 | Smilax_sp_300901627*                 |
| Solanales      | Solanaceae      | <i>Solanum aviculare</i>                 | KU564866                             | KU564614                             | KM895005                             |
| Solanales      | Solanaceae      | <i>Solanum corifolium</i>                | KM895705                             | KM894596                             | Solanum_corifolium_1076420444**      |
| Solanales      | Solanaceae      | <i>Solanum densevestitum</i>             | KM896028                             | KM894858                             | KM895321                             |
| Solanales      | Solanaceae      | <i>Solanum francisii</i>                 |                                      | Solanum_ditrichum_300201141*         | Solanum_ditrichum_300201141*         |
| Solanales      | Solanaceae      | <i>Solanum furfuraceum</i>               |                                      | KU564616                             | KU564733                             |
| Solanales      | Solanaceae      | <i>Solanum inaequilaterum</i>            | KU564869                             |                                      | KU564734                             |
| Solanales      | Solanaceae      | <i>Solanum mitchellianum</i>             | KM896159                             | KM894956                             | KM895397                             |
| Solanales      | Solanaceae      | <i>Solanum opacum</i>                    | KM895901                             | KM894748                             |                                      |
| Solanales      | Solanaceae      | <i>Solanum parvifolium</i>               | KM895712                             | KM894603.                            |                                      |
| Solanales      | Solanaceae      | <i>Solanum seaforthianum</i>             |                                      | Solanum_rixosum_300201142*           | Solanum_rixosum_300201142*           |
| Solanales      | Solanaceae      | <i>Solanum serpens</i>                   | KM896211                             | KM894998                             |                                      |
| Solanales      | Solanaceae      | <i>Solanum shirleyanum</i>               | KM895800                             | KM894669                             | KM895165                             |
| Solanales      | Solanaceae      | <i>Solanum stelligerum</i>               | KM895748                             | KM894631                             |                                      |
| Solanales      | Solanaceae      | <i>Solanum stupefactum</i>               |                                      | EU983572                             | KU564737                             |
| Solanales      | Solanaceae      | <i>Solanum torvum</i>                    | MH722383                             | GU135088                             | GU135422                             |
| Solanales      | Solanaceae      | <i>Solanum viridifolium</i>              | Solanum_viridifolium_300801581*      | Solanum_viridifolium_BATT700-10#     |                                      |
| Fabales        | Fabaceae        | <i>Sophora tomentosa</i>                 | AB127038                             | KU564621                             | KU564739                             |
| Solanales      | Solanaceae      | <i>Sophoraflavescens</i>                 | GQ436344                             | HM049520                             |                                      |
| Lamiales       | Lamiaceae       | <i>Spartothamnella juncea</i>            | KM895946                             | KM894784                             | KM895271                             |
| Paracryphiales | Paracryphiaceae | <i>Sphenostemon lobosporus</i>           |                                      | AY143606                             | LN607260                             |
| Poales         | Poaceae         | <i>Sporobolus virginicus</i>             | KJ773930                             | KJ773182                             |                                      |
| Ericales       | Ericaceae       | <i>Sprengelia sprengelioides</i>         | Sprengelia_sprengelioides_600300352* | Sprengelia_sprengelioides_600300352* | Sprengelia_sprengelioides_600300352* |
| Laurales       | Monimiaceae     | <i>Steghanthera laxiflora</i>            | Steghanthera_laxiflora_300501361*    | Steghanthera_laxiflora_300501361*    | Steghanthera_laxiflora_300501361*    |
| Proteales      | Proteaceae      | <i>Stenocarpus salignus</i>              | KM895500                             | KM894423                             | Stenocarpus_salignus_1076420547**    |
| Proteales      | Proteaceae      | <i>Stenocarpus sinuatus</i>              | KM895806                             | KM894674                             | Stenocarpus_sinuatus_1076420333**    |
| Ranunculales   | Menispermaceae  | <i>Stephania japonica var. japonica</i>  | Stephania_japonica_300701513*        | Stephania_japonica_300701513*        | Stephania_japonica_300701513*        |
| Ranunculales   | Menispermaceae  | <i>Stephania renifolia</i>               |                                      | KU564622                             | KU564740                             |
| Malvales       | Malvaceae       | <i>Sterculia quadrifida</i> <sup>c</sup> | KM896132                             | Sterculia_sp_300901701               |                                      |
| Solanales      | Malpighiaceae   | <i>Stictocardia tiliifolia</i>           | Stictocardia_tiliifolia_300201148*   | Stictocardia_tiliifolia_300201148*   | Stictocardia_tiliifolia_300201148*   |

|                   |                    |                                              |                                       |                                       |                                   |
|-------------------|--------------------|----------------------------------------------|---------------------------------------|---------------------------------------|-----------------------------------|
| Solanales         | Convolvulaceae     | <i>Stigmaphyllon australiense</i>            | Stigmaphyllon_australiense_300501362* | Stigmaphyllon_australiense_300501362* |                                   |
| Rosales           | Moraceae           | <i>Streblus brunonianus</i>                  | KM896134                              | KM894939                              | Streblus_brunonianus_1076420312** |
| Berberidopsidales | Berberidopsidaceae | <i>Streptothamnus moorei</i>                 | KM895591                              | KM894503                              | KM895071                          |
| Gentianales       | Loganiaceae        | <i>Strychnos psilosperma</i>                 | KM895936                              | KM894777                              |                                   |
| Ericales          | Symplocaceae       | <i>Symplocos baeuerlenii</i>                 | KM895743                              | KM894627                              | KM895158                          |
| Ericales          | Symplocaceae       | <i>Symplocos gittinsii</i>                   | Symplocos_gittinsii_300502363*        |                                       | Symplocos_gittinsii_300502363*    |
| Ericales          | Symplocaceae       | <i>Symplocos harroldii</i>                   | KM895758                              | KM894638                              |                                   |
| Ericales          | Symplocaceae       | <i>Symplocos puberula</i>                    | Symplocos_puberula_300501364*         |                                       | Symplocos_puberula_300501364*     |
| Ericales          | Symplocaceae       | <i>Symplocos stawellii</i>                   | KM895986                              | KM894819                              |                                   |
| Ericales          | Symplocaceae       | <i>Symplocos thwaitesii</i>                  | KU564878                              | KU564624                              | KU564742                          |
| Myrtales          | Myrtaceae          | <i>Syncarpia hillii</i>                      | KM895675                              | AY525139                              |                                   |
| Asterales         | Asteraceae         | <i>Synedrella nodiflora</i>                  | MH049956                              | HM989757                              | GU724254                          |
| Malpighiales      | Phyllanthaceae     | <i>Synostemon albiflorus</i>                 | KM895640                              | KM894539                              | Synostemon_albifloris_129308672** |
| Myrtales          | Myrtaceae          | <i>Synoum glandulosum</i>                    | KF496861                              | KM894993                              |                                   |
| Sapindales        | Meliaceae          | <i>Synoum glandulosum subsp. glandulosum</i> | Synoum_glandulosum_300701514*         | Synoum_glandulosum_300701514*         | KM895280                          |
| Myrtales          | Myrtaceae          | <i>Syzygium australe</i>                     | KM895907                              |                                       | KM895253                          |
| Myrtales          | Myrtaceae          | <i>Syzygium cormiflorum</i>                  | Syzygium_cormiflorum_300701505*       | Syzygium_cormiflorum_300701505*       |                                   |
| Myrtales          | Myrtaceae          | <i>Syzygium corynanthum</i>                  | KM896194                              | DQ088573                              |                                   |
| Myrtales          | Myrtaceae          | <i>Syzygium crebrinerve</i>                  | KU564879                              | KU564625                              | KU564743                          |
| Myrtales          | Myrtaceae          | <i>Syzygium cryptophlebium</i>               | Syzygium_cryptophlebium_300501365*    | Syzygium_cryptophlebium_300501365*    |                                   |
| Myrtales          | Myrtaceae          | <i>Syzygium cumini</i>                       | GU135224                              | GU135062                              | GU135395                          |
| Myrtales          | Myrtaceae          | <i>Syzygium endophloium</i>                  | Syzygium_endophloium_300501366*       | Syzygium_endophloium_300501366*       |                                   |
| Myrtales          | Myrtaceae          | <i>Syzygium erythroxum</i>                   | Syzygium_erythroxum_300501367*        | Syzygium_erythroxum_300501367*        |                                   |
| Myrtales          | Myrtaceae          | <i>Syzygium fibrosum</i>                     | Syzygium_fibrosum_300801590*          |                                       | Syzygium_fibrosum_300801590*      |
| Myrtales          | Myrtaceae          | <i>Syzygium francisii</i>                    | KM896098                              | KM894913                              | KM895364                          |
| Myrtales          | Myrtaceae          | <i>Syzygium gustavioides</i>                 | Syzygium_gustavioides_300501368*      | Syzygium_gustavioides_300501368*      |                                   |
| Myrtales          | Myrtaceae          | <i>Syzygium hodgkinsoniae</i>                | KM896178                              |                                       | KM895409                          |
| Myrtales          | Myrtaceae          | <i>Syzygium johnsonii</i>                    |                                       | KU564626                              | KU564744                          |
| Myrtales          | Myrtaceae          | <i>Syzygium kuranda</i>                      | Syzygium_kuranda_300901643*           | JN564162                              |                                   |
| Myrtales          | Myrtaceae          | <i>Syzygium luehmannii</i>                   | KM896171                              | KM894967                              | KM895401                          |
| Myrtales          | Myrtaceae          | <i>Syzygium oleosum</i>                      | Syzygium_oleosum_300701515*           | Syzygium_oleosum_300701515*           | Syzygium_oleosum_300701515*       |
| Myrtales          | Myrtaceae          | <i>Syzygium papyraceum</i>                   | Syzygium_papyraceum_300701516*        | Syzygium_papyraceum_300701516*        | Syzygium_papyraceum_300701516*    |

|                |                |                                                |                                       |                                       |                                       |
|----------------|----------------|------------------------------------------------|---------------------------------------|---------------------------------------|---------------------------------------|
| Myrtales       | Myrtaceae      | <i>Syzygium sayeri</i> <sup>C</sup>            | Syzygium_fibrosum_300801590*          | DQ088607                              |                                       |
| Myrtales       | Myrtaceae      | <i>Syzygium wesa</i>                           | Syzygium_wesa_300501369*              | JN564157                              | Syzygium_wesa_BATT598-10#             |
| Myrtales       | Myrtaceae      | <i>Syzygium wilsonii</i>                       | Syzygium_wilsonii_300701517*          | Syzygium_wilsonii_300701517*          |                                       |
| Gentianales    | Apocynaceae    | <i>Tabernaemontana orientalis</i>              | Tabernaemontana_orientalis_300501370* | Tabernaemontana_orientalis_300501370* |                                       |
| Gentianales    | Apocynaceae    | <i>Tabernaemontana pandacaqui</i>              | KM895696                              | GU973953                              |                                       |
| Dioscoreales   | Dioscoreaceae  | <i>Tacca leontopetaloides</i>                  | Tacca_leontopetaloides_300501371*     | Tacca_leontopetaloides_300501371*     | Tacca_leontopetaloides_300501371*     |
| Fabales        | Fabaceae       | <i>Tamarindus indica</i>                       | MH069853                              | MG737446                              | MH070011                              |
| Ericales       | Primulaceae    | <i>Tapeinosperma pseudojambosa</i>             | KU564882                              |                                       | KU564745                              |
| Ericales       | Primulaceae    | <i>Tapeinosperma repandulum</i>                | KM895628                              | KM894724                              | Tapeinosperma_repandulum_129308499**  |
| Gentianales    | Rubiaceae      | <i>Tarenna dallachiana subsp. dallachiana</i>  | Tarenna_dallichiana_300901628*        |                                       | Tarenna_dallichiana_300901628*        |
| Canellales     | Winteraceae    | <i>Tasmannia insipida</i>                      | KM895891                              |                                       | Tasmannia_insipida_1076420377**       |
| Canellales     | Winteraceae    | <i>Tasmannia membranacea</i>                   | Tasmannia_membranacea_300701518*      | Tasmannia_membranacea_300701518*      | Tasmannia_membranacea_300701518*      |
| Lamiales       | Bignoniaceae   | <i>Tecomanthe hillii</i>                       | KM895888                              | KM894740                              |                                       |
| Fabales        | Fabaceae       | <i>Tephrosia brachyodon var. brachyodon</i>    | Tephrosia_brachyodon_300501373*       |                                       | Tephrosia_brachyodon_300501373*       |
| Myrtales       | Combretaceae   | <i>Terminalia catappa</i>                      |                                       | GU135057                              | GU135388                              |
| Myrtales       | Combretaceae   | <i>Terminalia melanocarpa</i>                  | Terminalia_melanocarpa_300701519*     | Terminalia_melanocarpa_300701519*     | KF794057                              |
| Myrtales       | Combretaceae   | <i>Terminalia muelleri</i>                     | Terminalia_muelleri_300501375*        | Terminalia_muelleri_300501375*        | GU135389                              |
| Myrtales       | Combretaceae   | <i>Terminalia porphyrocarpa</i>                | KM894791                              | KM894936                              |                                       |
| Myrtales       | Combretaceae   | <i>Terminalia sericocarpa</i>                  | Terminalia_sericocarpa_300501376*     | Terminalia_sericocarpa_300501376*     |                                       |
| Myrtales       | Combretaceae   | <i>Terminaliaaarenicola</i>                    | Terminalia_arenicola_300801620*       | Terminalia_arenicola_300801620*       |                                       |
| Dilleniales    | Dilleniaceae   | <i>Tetracera nordtiana</i>                     | Tetracera_nordtiana_300701520*        | Tetracera_nordtiana_300701520*        |                                       |
| Caryophyllales | Aizoaceae      | <i>Tetragonia tetragonoides</i>                | MF065506                              | KX197708                              | HM193548                              |
| Vitales        | Vitaceae       | <i>Tetrastigma nitens</i>                      | KM896059                              | KM894882                              | KM895339                              |
| Vitales        | Vitaceae       | <i>Tetrastigma thorsborneorum</i>              | Tetrastigma_thorsborneorum_300701521* | Tetrastigma_thorsborneorum_300701521* | Tetrastigma_thorsborneorum_300701521* |
| Lamiales       | Lamiaceae      | <i>Teucrium sp. (Ormeau G.Leiper AQ476858)</i> | KM896119                              | KM894929                              | Teucrium_spOrmeau_GLeiper_129307923** |
| Poales         | Poaceae        | <i>Themeda triandra</i>                        | Themeda_triandra_600200206*           | LN906787                              | Themeda_triandra_600200206*           |
| Malvales       | Malvaceae      | <i>Thespesia populnea</i>                      | Thespesia_populnea_300701522*         | Thespesia_populnea_300701522*         | Thespesia_populnea_300701522*         |
| Malvales       | Malvaceae      | <i>Thespesia populneoides</i>                  | Thespesia_populneoides_300501378*     | Thespesia_populneoides_300501378*     |                                       |
| Poales         | Poaceae        | <i>Thuarea involuta</i>                        | MH767616                              | MH767917                              |                                       |
| Gentianales    | Rubiaceae      | <i>Timonius singularis</i>                     |                                       | Timonius_singularis_300701524*        | Timonius_singularis_300701524*        |
| Gentianales    | Rubiaceae      | <i>Timonius timon var. timon</i>               | Timonius_timon_300701523*             | Timonius_timon_300701523*             | Timonius_timon_300701523*             |
| Ranunculales   | Menispermaceae | <i>Tinospora smilacina</i>                     | KM896002                              | KM894831                              |                                       |

|              |               |                                              |                                        |                                        |                                        |
|--------------|---------------|----------------------------------------------|----------------------------------------|----------------------------------------|----------------------------------------|
| Sapindales   | Sapindaceae   | <i>Toechima dasyrrhache</i>                  | KM895765                               |                                        | KM895173                               |
| Sapindales   | Sapindaceae   | <i>Toechima tenax</i>                        | KM895676                               | KM894568                               |                                        |
| Sapindales   | Meliaceae     | <i>Toona ciliata</i>                         | KM895616                               |                                        | KM895079                               |
| Apiales      | Apiaceae      | <i>Trachymene incisa</i>                     | Trachymene_incisa_600100082*           | Trachymene_incisa_600400458*           | Trachymene_incisa_600400458*           |
| Malpighiales | Euphorbiaceae | <i>Tragia novae-hollandiae</i>               | KM895797                               |                                        | KP794515                               |
| Rosales      | Cannabaceae   | <i>Trema orientalis</i>                      | KM895509                               | KM894431                               | KM895387                               |
| Rosales      | Cannabaceae   | <i>Trema tomentosa</i> var. <i>tomentosa</i> | Trema_tomentosa_300701525*             | Trema_tomentosa_300701525*             | Trema_tomentosa_300701525*             |
| Rosales      | Cannabaceae   | <i>Trema tomentosa</i> var. <i>viridus</i>   | Trema_tomentosa_var_viridus_300501379* | Trema_tomentosa_var_viridus_300501379* | Trema_tomentosa_var_viridus_300501379* |
| Cucurbitales | Cucurbitaceae | <i>Trichosanthes subvelutina</i>             | Trichosanthes_subvelutina_1076420284** | KM894965                               |                                        |
| Asterales    | Asteraceae    | <i>Tridax procumbens</i>                     | KJ773956                               | MH621606                               | MH622133                               |
| Gentianales  | Rubiaceae     | <i>Triflorensia cameronii</i>                | KM895574                               | KM894484                               | Triflorensia_cameronii_129308650**     |
| Gentianales  | Rubiaceae     | <i>Triflorensia ixoroides</i>                | KM895625                               | KM894527                               |                                        |
| Malpighiales | Euphorbiaceae | <i>Trigonostemon inopinatus</i>              | Trigonostemon_inopinatus_300501380*    |                                        | Trigonostemon_inopinatus_300501380*    |
| Myrtales     | Myrtaceae     | <i>Tristaniopsis laurina</i>                 | KM895945                               | KM894782                               |                                        |
| Proteales    | Proteaceae    | <i>Triunia youngiana</i>                     | KM895974                               |                                        | KM895360                               |
| Ericales     | Ericaceae     | <i>Trochocarpa laurina</i>                   | KM895506                               | KM894428                               | KM895010                               |
| Rosales      | Moraceae      | <i>Trophis scandens</i>                      | KM895723                               |                                        | KM895143                               |
| Sapindales   | Meliaceae     | <i>Turraea pubescens</i>                     | KM895935                               | KM894776                               |                                        |
| Gentianales  | Apocynaceae   | <i>Tylophora benthamii</i>                   |                                        | KM894479                               | KM895054                               |
| Gentianales  | Apocynaceae   | <i>Tylophora grandiflora</i>                 | KU564884                               |                                        | KU564746                               |
| Gentianales  | Apocynaceae   | <i>Tylophora paniculata</i>                  | KM895596                               | KM894506                               |                                        |
| Malvales     | Malvaceae     | <i>Urena lobata</i>                          | GU135283                               | GU135114                               | GU135323                               |
| Poales       | Poaceae       | <i>Urochloa mutica</i>                       | GU135137                               | GU134975                               | GU135304                               |
| Rosales      | Urticaceae    | <i>Urtica incisa</i>                         | KM895773                               |                                        | KM895176                               |
| Sapindales   | Meliaceae     | <i>Vavaea amicorum</i>                       | Vavaea_amicorum_300901706*             | Vavaea_amicorum_300501381*             | Vavaea_amicorum_300901706*             |
| Rosales      | Rhamnaceae    | <i>Ventilago ecorollata</i>                  | Ventilago_ecorollata_300701526*        | Ventilago_ecorollata_300701526*        | Ventilago_ecorollata_300701526*        |
| Rosales      | Rhamnaceae    | <i>Ventilago pubiflora</i>                   | KM896050                               |                                        | KM895335                               |
| Fabales      | Fabaceae      | <i>Vigna</i> sp.                             | Vigna_sp_300901635                     |                                        |                                        |
| Gentianales  | Apocynaceae   | <i>Vincetoxicum carnosum</i>                 | KM896034                               | KM894862                               | KM895324                               |
| Gentianales  | Apocynaceae   | <i>Vincetoxicum ovatum</i>                   | KM896097                               | KM894912                               |                                        |
| Santalales   | Santalaceae   | <i>Viscum articulatum</i>                    | KF496504                               | Viscum_articulatum_BATT450-10#         | Viscum_articulatum_BATT450-10#         |
| Lamiales     | Lamiaceae     | <i>Vitex lignum-vitae</i>                    | Vitex_lignum-vitae_1076418806**        | KM894602                               |                                        |

|              |                  |                                                 |                                    |                                    |                                     |
|--------------|------------------|-------------------------------------------------|------------------------------------|------------------------------------|-------------------------------------|
| Lamiales     | Lamiaceae        | <i>Vitex melicopea</i>                          | KM896198                           | KM894988                           |                                     |
| Lamiales     | Lamiaceae        | <i>Vitex queenslandica</i>                      | MG836356                           | MG836385                           |                                     |
| Lamiales     | Lamiaceae        | <i>Vitex rotundifolia</i>                       | Vitex_rotundifolia_300801609*      | Vitex_rotundifolia_300801609*      | JQ319674                            |
| Lamiales     | Lamiaceae        | <i>Vitex trifolia</i>                           | MH069861                           | AB284175                           | MH070020                            |
| Malvales     | Malvaceae        | <i>Waltheria indica</i>                         | JQ594224                           | JQ589310                           | KR735284                            |
| Myrtales     | Myrtaceae        | <i>Waterhousea floribunda</i>                   | Waterhousea_floribunda_1076420468* | KM894811                           |                                     |
| Malvales     | Thymelaeaceae    | <i>Wikstroemia indica</i>                       | KM895779                           | KM894856                           | KM895178                            |
| Laurales     | Monimiaceae      | <i>Wilkiea austroqueenslandica</i>              | KM895722                           | KM894611                           |                                     |
| Laurales     | Monimiaceae      | <i>Wilkiea huegeliana</i>                       | KM896096                           | KM894910                           |                                     |
| Laurales     | Monimiaceae      | <i>Wilkiea macrophylla</i>                      | KM895665                           | KM894559                           | KM895060                            |
| Laurales     | Monimiaceae      | <i>Wilkiea pubescens</i>                        | Wilkiea_pubescens_300501382*       | Wilkiea_pubescens_300501382*       |                                     |
| Gentianales  | Apocynaceae      | <i>Wrightia pubescens subsp. Penicillata</i>    | Wrightia_versicolor_300501383*     | Wrightia_versicolor_300501383*     | Wrightia_versicolor_300501383*      |
| Fabales      | Polygalaceae     | <i>Xanthophyllum octandrum</i>                  | Xanthophyllum_octandrum_300701527* | Xanthophyllum_octandrum_300701527* | Xanthophyllum_octandrum_300701527*  |
| Asparagales  | Xanthorrhoeaceae | <i>Xanthorrhoea latifolia</i>                   | Xanthorrhoea_latifolia_600400511*  | Xanthorrhoea_latifolia_600400511*  | Xanthorrhoea_latifolia_600400511*   |
| Myrtales     | Myrtaceae        | <i>Xanthostemon oppositifolius</i> <sup>c</sup> | KM896125                           | AF368227                           |                                     |
| Solanales    | Convolvulaceae   | <i>Xenostegia tridentata</i>                    | MH767523                           | MH767830                           |                                     |
| Santalales   | Olacaceae        | <i>Ximenia americana</i>                        | DQ790149                           | KJ012821                           |                                     |
| Sapindales   | Meliaceae        | <i>Xylocarpus granatum</i>                      | KM895563                           | KM894474                           |                                     |
| Magnoliales  | Annonaceae       | <i>Xylopia maccreae</i>                         | Xylopia_maccreae_300801586*        | Xylopia_maccreae_300801586*        | KM924998                            |
| Malpighiales | Salicaceae       | <i>Xylosma ovata</i>                            | KU564885                           |                                    | KU564747                            |
| Malpighiales | Salicaceae       | <i>Xylosma terrae-reginae</i>                   | KM896063                           | KM894887                           | Xylosma_terrae-reginae_1076420421** |
| Asterales    | Asteraceae       | <i>Youngia japonica</i>                         | EU385029                           | MH621581                           | KP402578                            |
| Sapindales   | Rutaceae         | <i>Zanthoxylum brachyacanthum</i>               | KM895523                           | KM894443                           |                                     |
| Sapindales   | Rutaceae         | <i>Zanthoxylum nitidum</i>                      | KF240649                           | KP093339                           | KF240710                            |
| Cucurbitales | Cucurbitaceae    | <i>Zehneria cunninghamii</i>                    | Zehneria_cunninghamii_300501384*   | Zehneria_cunninghamii_300501384*   | Zehneria_cunninghamii_300501384*    |
| Sapindales   | Rutaceae         | <i>Zieria smithii</i>                           | KM895516                           | KM894436                           | KM895018                            |
