# Supplementary material
Source: MDPI journal article supplement (https://www.mdpi.com/1424-2818/15/3/378)
Supplement: s1 [file s1]

Archive with 2 entries (2 files):
- Supplimentary Figures.pdf
- Table S1. List of species and Accession numbers.pdf
